1     **The genome of an apodid holothuroid (*Chiridota heheva*) provides insights**  
2                     **into its adaptation to deep-sea reducing environment**

3     Running title: Genome assembly of *Chiridota heheva*

4     Long Zhang<sup>1,2†</sup>, Jian He<sup>1,2†</sup>, Peipei Tan<sup>1,2</sup>, Zhen Gong<sup>3</sup>, Shiyu Qian<sup>4</sup>, Yuanyuan Miao<sup>1</sup>, Han-  
5     Yu Zhang<sup>5</sup>, Qi Chen<sup>1,2</sup>, Qiqi Zhong<sup>1</sup>, Guanzhu Han<sup>3</sup>, Jianguo He<sup>1,2,6,7\*</sup>, Muhua Wang<sup>1,2\*</sup>

6     **Affiliations:**

7     1. State Key Laboratory for Biocontrol, School of Marine Sciences, Sun Yat-sen University,  
8     Zhuhai 519000, China.

9     2. Southern Marine Science and Engineering Guangdong Laboratory (Zhuhai), Zhuhai  
10     519000, China.

11     3. College of Life Sciences, Nanjing Normal University, Nanjing 210023, China.

12     4. School of Medicine, Jinan University, Guangzhou 510632, China.

13     5. Hainan Key Laboratory of Marine Georesource and Prospecting, Institute of Deep-sea  
14     Science and Engineering, Chinese Academy of Sciences, Sanya 572000, China.

15     6. School of Life Sciences, Sun Yat-sen University, Guangzhou 510275, China.

16     7. Maoming Branch, Guangdong Laboratory for Lingnan Modern Agricultural Science and  
17     Technology, Maoming 525435, China.

18     † These authors contributed equally to this work.

19

20     **\*Correspondence:**

21     Muhua Wang: wangmuh@mail.sysu.edu.cn

22     Jianguo He: lsshjg@mail.sysu.edu.cn

23

24

25 **Abstract**

26 Cold seeps and hydrothermal vents are deep-sea reducing environments that are characterized  
27 by a lack of oxygen, photosynthesis-derived nutrients and a high concentration of reducing  
28 chemicals. Apodida is an order of deep-sea echinoderms lacking tube feet and complex  
29 respiratory trees, which are commonly found in holothurians. *Chiridota heheva* Pawson &  
30 Vance, 2004 (Apodida: Chiridotidae) is one of the few echinoderms that resides in deep-sea  
31 reducing environments. Unlike most cold seep and hydrothermal vent-dwelling animals, *C.*  
32 *heheva* does not survive by maintaining an epi- or endosymbiotic relationship with  
33 chemosynthetic microorganisms. The species acquires nutrients by extracting organic  
34 components from sediment detritus and suspended material. Here, we report a high-quality  
35 genome of *C. heheva* as a genomic reference for echinoderm adaptation to reducing  
36 environments. *Chiridota heheva* likely colonized its current habitats in the early Miocene.  
37 The expansion of the aerolysin-like protein family in *C. heheva* compared with other  
38 echinoderms might be involved in the disintegration of microbes during digestion, which in  
39 turn facilitates the species' adaptation to cold seep environments. Moreover, several hypoxia-  
40 related genes were subject to positive selection in the genome of *C. heheva*, which contributes  
41 to their adaptation to hypoxic environments.

42

43 **Keywords**

44 Reference genome, *Chiridota heheva*, Echinoderms, Cold seep, Aerolysin, Hypoxia

45

## 46 **1. Introduction**

47 Echinodermata is a phylum of marine animals comprising 5 extant classes, including  
48 Asterozoa (starfish), Ophiurozoa (brittle star), Echinozoa (sea urchin), Crinozoa (feather  
49 star), and Holothurozoa (sea cucumber) (Pawson, 2007). Adult echinoderms are  
50 characterized by having a body showing pentameral symmetry, a water vascular system with  
51 external tube feet (podia), and an endoskeleton consisting of calcareous ossicles (Pechenik,  
52 2015). Echinoderms exhibit a high divergence in morphology, from the star-like architecture  
53 in Asterozoa to the worm-like architecture in Holothurozoa (Mooi & David, 2008; Smith et  
54 al., 2013).

55

56 Compared with other echinoderms, holothurians have a unique body architecture and  
57 evolutionary history. The worm-like body of the holothurian preserves the pentameral  
58 symmetry structurally along the oral-aboral axis (Li et al., 2020). In addition, holothurians  
59 have a soft and stretchable body, in which the ossicles are greatly reduced in size (Pechenik,  
60 2015). Variations in body architecture also exist in Holothurozoa. The order Apodida is a  
61 group of holothurians that are found in both shallow-water and deep-sea environments  
62 (Pawson & Vance, 2004). Phylogenetic analyses showed that Apodida is sister to other orders  
63 of Holothurozoa (Lacey et al., 2005; Miller et al., 2017). Apodid holothurians lack tube feet  
64 and complex respiratory trees, making them morphologically distinct from other holothurians  
65 (Pechenik, 2015). In contrast to other classes of Echinodermata, which experienced a severe  
66 evolutionary bottleneck during the Permian-Triassic mass extinction interval, Holothurozoa

67 did not experience family-level extinction through the interval. The deposit-feeding lifestyle  
68 of holothurians conferred a selective advantage during the primary productivity collapse of  
69 the Permian-Triassic mass extinction (Twitchett & Oji, 2005). As the genome of only one  
70 shallow-water holothurian (*Apostichopus japonicus*) has been assembled and analyzed (Li et  
71 al., 2018; Zhang et al., 2017), it is critical to study the genomes of more holothurians to  
72 dissect their evolutionary history and developmental processes.

73

74 Cold seeps and hydrothermal vents are deep-sea reducing environments that are  
75 characterized by high hydrostatic pressure, low temperature, lack of oxygen and  
76 photosynthesis-derived nutrients, and high concentrations of reducing chemicals (Levin,  
77 2005). However, these harsh environments support a variety of macroinvertebrates, including  
78 tubeworms, mussels, clams, and gastropods (Vanreusel et al., 2009). Most of these  
79 macrobenthos depend on the epi- or endosymbiotic relationships with chemoautotrophic  
80 microorganisms for nutrition (Van Dover et al., 2002). Recent genomic analyses have  
81 revealed the genetic basis of adaptation in several seep- and vent-dwelling macrobenthos  
82 hosting symbiotic bacteria (Li et al., 2019; Sun et al., 2020; Sun et al., 2017; Y. Sun et al.,  
83 2021). However, nonsymbiotic animals residing in deep-sea reducing environments are  
84 understudied with only one reported genome (Liu et al., 2020).

85

86 Hydrocarbon fluid seepage from cold seeps is completely devoid of O<sub>2</sub> and comprises  
87 high levels of sulfides. After reacting with sulfides contained in the fluid, any free O<sub>2</sub> is

88 removed from the deep-sea water. There are unique mechanisms of hypoxic adaptation in  
89 seep-dwelling animals, as their O<sub>2</sub> consumption rates are similar to those of related shallow-  
90 water species (Hourdez & Lallier, 2007). However, the genomic basis of hypoxic adaptation  
91 in seep-dwelling animals is still lacking.

92

93 Echinoderms are a rare component of deep-sea chemosynthetic ecosystems (Tunnicliffe,  
94 1992). *Chiridota heheva* Pawson & Vance, 2004 (Apodida: Chiridotidae) is one of the few  
95 echinoderms that occupies all three types of chemosynthetic ecosystems (hydrothermal vent,  
96 cold seep, and whale fall) (Thomas et al., 2020). This suggests that the species is well adapted  
97 to deep-sea reducing environments. Unlike most seep- and vent-dwelling species, *C. heheva*  
98 does not host chemosynthetic bacteria (Pawson & Vance, 2004). *Chiridota heheva* derives  
99 nutrients from a variety of sources, extracting organic components from sediment detritus,  
100 suspended material, and wood fragments when available (Carney, 2010; Pawson & Vance,  
101 2004). A peltate-digitate tentacle structure allows *C. heheva* to exploit various food sources  
102 by switching between deposit and suspension feeding (Thomas et al., 2020). The  
103 cosmopolitan distribution and special lifestyle of *C. heheva* make it an ideal model to study  
104 adaptation to deep-sea reducing environments in nonsymbiotic animals.

105

106 Here, we assembled and annotated a high-quality genome of *C. heheva* collected from  
107 the Haima cold seep in the South China Sea. The evolutionary history of *C. heheva* was  
108 investigated by inferring the phylogenetic relationship among echinoderms and the

109 demographic history of *C. heheva* and a shallow-water holothurian (*Apostichopus japonicus*).

110 Additionally, comparative genomic analyses were performed to dissect the genomic basis of

111 adaptation to deep-sea reducing environments in *C. heheva*.

112

## 113 **2 Methods and Materials**

### 114 **2.1 Sample collection and genome sequencing**

115       The *C. heheva* sample used in this study was collected using manned submersible  
116 *Shenhaiyongshi* from the Haima cold seep in the South China Sea (16° 73.228' N, 110°  
117 46.143' E, 1,385 m deep) on August 2, 2019. The *C. heheva* individuals were kept in an  
118 enclosed sample chamber placed in the sample basket of the submersible. Once the samples  
119 were brought to the upper deck of the mothership, the muscle of the individuals was dissected,  
120 cut into small pieces, and immediately stored at -80°C. The samples were then transported to  
121 Sun Yat-sen University on dry-ice and stored at -80°C until use.

122

123       To construct Nanopore sequencing library, high molecular weight genomic DNA was  
124 prepared by the CTAB method. The quality and quantity of the DNA were measured via  
125 standard agarose gel electrophoresis and with a Qubit<sup>®</sup>4.0 Fluorometer (Invitrogen).  
126 Sequencing library was constructed and sequenced by Nanopore PromethION platform  
127 (Oxford Nanopore Technologies). Additionally, DNA was extracted to construct Illumina  
128 sequencing library. The quality and quantity of the DNA were measured via standard agarose  
129 gel electrophoresis and with a Qubit<sup>®</sup>2.0 Fluorometer (Invitrogen). Sequencing library was  
130 constructed and sequenced by Illumina Novaseq platform (Illumina).

131

### 132 **2.2 Genome assembly**

#### 133 **2.2.1 Mitochondrial genome assembly**

134 Low quality (reads with  $\geq 10\%$  unidentified nucleotide and/or  $\geq 50\%$  nucleotides having  
135 phred score  $< 5$ ) and sequencing-adaptor-contaminated Illumina reads were filtered with  
136 custom C script. The filtered Illumina reads were then trimmed with Fastp (v0.21.0) (Chen et  
137 al., 2018) to obtain high-quality Illumina reads, which were used in the following analyses.  
138 Mitochondrial genome of *C. heheva* was assembled using the two-step mode of mitoZ (v2.4)  
139 (Meng et al., 2019) with the high-quality Illumina reads. And the assembled genome was  
140 annotated using mitoZ (v2.4) with parameter "--clade Echinodermata".

141

#### 142 2.2.2 Nuclear genome assembly

143 The size and heterozygosity of *C. heheva* genome were estimated using high-quality  
144 Illumina reads by *k*-mer frequency distribution method. The number of *k*-mers and the peak  
145 depth of *k*-mer sizes at 17 was obtained using Jellyfish (v2.3.0) (Marcais & Kingsford, 2011)  
146 with the -C setting. Genome size was estimated based on the *k*-mer analysis as described  
147 previously (Star et al., 2011).

148

149 Low quality Nanopore reads were filtered using custom Python script. Two draft  
150 genome assemblies were generated using filtered Nanopore reads with Shasta (v0.4.0) (Shafin  
151 et al., 2020) and WTDBG2 (v2.5) (Ruan & Li, 2020), respectively. The contigs of the two  
152 draft assemblies were subject to error correction using filtered Nanopore reads with Racon  
153 (v1.4.16) (Vaser et al., 2017) three times. The corrected contigs were then polished with high-  
154 quality Illumina reads with Pilon (v1.23) (Walker et al., 2014) three times. The error-  
155 corrected contigs of Shasta assembly and WTDBG2 assembly were assembled into longer



156 sequences using quickmerge (v0.3) (Chakraborty et al., 2016). The merged contigs were  
157 subject to error correction using filtered Nanopore reads with Racon three times, and then  
158 using high-quality Illumina reads with Pilon three times. As the heterozygosity of *C. heheva*  
159 genome is high, haplotypic duplications in the assembled genome were identified and  
160 removed using purge\_dups (v1.2.3) (Guan et al., 2020). The completeness and quality of the  
161 assembly was evaluated using BUSCO (v4.0.5) (Simao et al., 2015) against the conserved  
162 Metazoa dataset (obd10), and SQUAT with high-quality Illumina reads (Yang et al., 2019).

163

## 164 **2.3 Genome annotation**

### 165 2.3.1 Repetitive element annotation

166 Repetitive elements in the assembly were identified by *de novo* predictions using  
167 RepeatMasker (v4.1.0) (<https://www.repeatmasker.org/>). A *de novo* repeat library for *C.*  
168 *heheva* was built using RepeatModeler (v2.0.1) (Flynn et al., 2020). To identify repetitive  
169 elements, sequences from the *C. heheva* assembly were aligned to the *de novo* repeat library  
170 using RepeatMasker (v4.1.0). Additionally, repetitive elements in *C. heheva* genome  
171 assembly were identified by homology searches against known repeat databases using  
172 RepeatMasker (v4.1.0). A repeat landscape of *C. heheva* genome was obtained using an R  
173 script that was modified from <https://github.com/ValentinaBoP/TransposableElements>.

174

### 175 2.3.2 Protein-coding gene annotation

176 We applied a combination of homology-based and *de novo* predication methods to build  
177 consensus gene models for the *C. heheva* genome assembly. For homology-based gene  
178 prediction, protein sequences of *Helobdella robusta*, *Lytechinus variegatus*,  
179 *Strongylocentrotus purpuratus*, *Dimorphilus gyrociliatus*, *Apostichopus japonicus* and  
180 *Acanthaster planci* were aligned to the *C. heheva* genome assembly using tblastn. The exon-  
181 intron structures then were determined according to the alignment results using  
182 GenomeThreader (v1.7.0) (Gremme et al., 2005). In addition, *de novo* gene prediction was  
183 performed using Augustus (v3.3.2) (Stanke et al., 2006), with the parameters obtained by  
184 training the software with protein sequences of *Drosophila melanogaster* and *Parasteatoda*  
185 *tepidariorum*. Two sets of gene models were integrated into a non-redundant consensus gene  
186 set using EvidenceModeler (v1.1.1) (Haas et al., 2008). To identify functions of the predicted  
187 proteins, we aligned the *C. heheva* protein models against NCBI NR, trEMBL, and SwissProt  
188 database using blastp (E-value threshold:  $10^{-5}$ ), and against eggNOR database (Huerta-Cepas  
189 et al., 2019) using eggNOR-Mapper (Huerta-Cepas et al., 2017). In addition, KEGG  
190 annotation of the protein models was performed using GhostKOALA (Kanehisa et al., 2016).

191

## 192 **2.4 Phylogenomic analysis**

193 Protein sequences of 15 metazoan species (*A. planci*, *S. purpuratus*, *Lytechinus*  
194 *variegatus*, *A. japonicus*, *Anneissia japonica*, *Saccoglossus kawalevskii*, *Branchiostoma*  
195 *floridae*, *Ciona intestinalis*, *Danio rerio*, *Gallus gallus*, *H. robusta*, *Mus musculus*, *Pelodiscus*  
196 *sinensis*, *Petromyzon marinus*, and *Xenopus laevis* proteins) were downloaded from NCBI.

197 And protein sequences of *Parastichopus parvimensis* were downloaded from Echinobase  
198 (Kudtarkar & Cameron, 2017). OrthoMCL (v2.0.9) (Li et al., 2003) was applied to determine  
199 and cluster gene families among these 16 metazoan species and *C. heheva*. Gene clusters  
200 with >100 gene copies in one or more species were removed. Single-copy orthologs in each  
201 gene cluster were aligned using MAFFT (v7.310) (Kato et al., 2002). And the alignments  
202 were trimmed using ClipKit (v1.1.3) (Steenwyk et al., 2020) with “gappy” mode. The  
203 phylogenetic tree was reconstructed with the trimmed alignments using a maximum-  
204 likelihood method implemented in IQ-TREE2 (v2.1.2) (Minh et al., 2020) with *H. robusta* as  
205 outgroup. The best-fit substitution model was selected by using ModelFinder algorithm  
206 (Kalyaanamoorthy et al., 2017). Branch supports were assessed using the ultrafast bootstrap  
207 (UFBoot) approach with 1,000 replicates (Hoang et al., 2018).

208

209 To estimate the divergent time among echinoderms, single-copy orthologs were  
210 identified among *A. japonica*, *A. planci*, *A. japonicus*, *P. parvimensis*, *C. heheva*, *L.*  
211 *variegatus* and *S. purpuratus* after running OrthoMCL pipeline as mentioned above. Single-  
212 copy orthologs were aligned using MAFFT (v7.310), trimmed using ClipKit (v1.1.3) with  
213 ‘gappy’ mode, and concatenated using PhyloSuite (v1.2.2) (Zhang et al., 2020). Divergent  
214 time among 7 echinoderms were estimated using the concatenated alignment with MCMCtree  
215 module of the PAML package (v4.9) (Tessmar-Raible & Arendt, 2003). MCMCtree analysis  
216 was performed using the maximum-likelihood tree that was reconstructed by IQ-TREE2 as a  
217 guide tree and calibrated with the divergent time obtained from TimeTree database (minimum

218 = 193 million years and soft maximum = 350 million years between *L. variegatus* and *S.*  
219 *purpuratus*).

220

## 221 **2.5 Demographic inference of *C. heheva* and *A. japonicus***

222 Paired-end Illumina reads of *A. japonicus* (Li et al., 2018) were downloaded from NCBI  
223 SRA database. The reads of *A. japonicus* were filtered with custom C script and trimmed with  
224 fastp (v0.21.0). The Illumina clean reads of *C. heheva* and *A. japonicus* were aligned to the  
225 respective reference genome assembly using BWA (v0.7.17) (Li & Durbin, 2009) with “mem”  
226 function. Genetic variants were identified using Samtools (v1.9) (Li et al., 2009). Whole  
227 genome consensus sequence was generated with the genetic variants using Samtools (v 1.9).  
228 PSMC (v0.6.5) (Li & Durbin, 2011) was used to infer the demographic history of *C. heheva*  
229 and *A. japonicus* using the whole genome consensus sequences. The substitution mutations  
230 rate and generation time of *C. heheva* and *A. japonicus* was set to  $1.0 \times 10^{-8}$  and 3 years  
231 according to the previous study of *A. planci* (Hall et al., 2017).

232

## 233 **2.6 Homeobox gene analysis**

234 Homeobox genes in *C. heheva* genome were identified by following the procedure  
235 described previously (Marletaz et al., 2019). Homeodomain sequences, which were retrieved  
236 from HomeoDB database (<http://homeodb.zoo.ox.ac.uk>) (Zhong et al., 2008), were aligned to  
237 *C. heheva* genome assembly using tbalstn. Sequences of the candidate homeobox genes were

238 extracted based on the alignment results. The extracted sequences were aligned against NCBI  
239 NR and HomeoDB database to classify the homeobox genes.

240

## 241 **2.7 Gene family evolution**

### 242 2.7.1 Gene family expansion and contraction analysis

243 r8s (v1.7) (Sanderson, 2003) was applied to obtain the ultrametric tree of 7 echinoderm  
244 species, which is calibrated with the divergent time between *A. planci* and *S. purpuratus* (541  
245 mya). CAFÉ (v5) (De Bie et al., 2006) was applied to determine the significance of gene  
246 family expansion and contraction among 7 echinoderm species based on the ultrametric tree  
247 and the gene clusters determined by OrthoMCL (v2.0.9).

248

### 249 2.7.2 Evolutionary analysis of *C. heheva* NOD-like receptors (NLRs) and other representative 250 metazoan NLRs

251 We used HMMER (v3.1) to search against the proteome of *C. heheva* with the HMM  
252 profile of NACHT domain (PF05729) retrieved from Pfam 34.0 as the query and an *e* cut-off  
253 value of 0.01. Proteins identified by the HMM search were retrieved from the proteome and  
254 aligned with 964 representative proteins from eukaryotes and prokaryotes (Urbach &  
255 Ausubel, 2017), and other representative metazoan NLRs (Yuen et al., 2014) using hmalign  
256 method implemented in HMMER (v3.1) based on the STAND NTPase domain. The  
257 alignment was refined by manual editing. The large-scale phylogenetic analysis was  
258 performed using an approximate maximum likelihood method implemented in FastTree

259 (Price et al., 2010). Representative SWACOS and MaIT NTPases were used as outgroups  
260 (Urbach & Ausubel, 2017). Significant hits clustering with metazoan NLRs were regarded as  
261 NLRs, and protein domain organizations were annotated through hmmscan method  
262 implemented in HMMER (v3.1).

263

264 To explore the evolutionary relationships among *C. heheva* NLRs and other  
265 representative metazoan NLRs, we reconstructed the phylogenetic tree of NLRs. The NACHT  
266 domains of *C. heheva* NLRs and representative metazoan NLRs were aligned using MAFFT  
267 (v7.310), and then refined by manual editing. The representative metazoan NLRs were chosen  
268 from literature (Yuen et al., 2014). The phylogenetic tree was reconstructed using a  
269 maximum-likelihood method implemented in IQ-TREE2 (v2.1.2). The best-fit substitution  
270 model selected by using ModelFinder algorithm. Branch supports were assessed using the  
271 UFBoot approach with 1,000 replicates.

272

## 273 **2.8 Identification and analysis of positively selected genes**

274 Branch-site models implemented in the codeml module of the PAML package is widely  
275 used to identify positively selected genes (PSGs). Thus, we identified PSGs in the *C. heheva*  
276 genome within the single-copy orthologs among 7 echinoderm species, based on the branch-  
277 site models using GWideCodeML (v1.1) (Macias et al., 2020). *C. heheva* was set as the  
278 ‘foreground’ phylogeny, and the other species were set as the ‘background’ phylogeny. An  
279 alternative branch site model (Model = 2, NSsites = 2, and fix\_omega = 0) and a neutral

280 branch site model (Model = 2, NSsites = 2, fix\_omega = 1, and omega = 1) were tested.  
281 Genes with Bayesian Empirical Bayes (BEB) sites > 90 % and a corrected *P*-value < 0.1 were  
282 identified to have been subject to positive selection.

283

284 To investigate *LHPP* gene evolution, sequences of *LHPP* from 8 mammals (*Odobenus*  
285 *rosmarus*, *Orcinus orca*, *Lipotes vexillifer*, *Tursiops truncatus*, *Physeter catodon*,  
286 *Balaenoptera acutorostrata*, *Mus musculus*, and *Homo sapiens*) and 7 echinoderms (*A.*  
287 *japonica*, *A. planci*, *A. japonicus*, *P. parvimensis*, *C. heheva*, *L. variegatus* and *S. purpuratus*)  
288 were aligned using MAFFT (v7.310). To reconstruct the phylogenetic tree, OrthoMCL  
289 (v2.0.9) (Li et al., 2003) was applied to determine and cluster gene families among these 15  
290 species. Gene clusters with >100 gene copies in one or more species were removed. Single-  
291 copy orthologs in each gene cluster were aligned using MAFFT (v7.310) (Kato et al., 2002).  
292 And the alignments were trimmed using ClipKit (v1.1.3) (Steenwyk et al., 2020) with “gappy”  
293 mode. The phylogenetic tree was reconstructed with the trimmed alignments using a  
294 maximum-likelihood method implemented in IQ-TREE2 (v2.1.2) (Minh et al., 2020). *H.*  
295 *robusta* was used as outgroup. The best-fit substitution model was selected by using  
296 ModelFinder algorithm (Kalyaanamoorthy et al., 2017).

## 297 **3. Results**

### 298 **3.1 Characterization and genome assembly of *C. heheva***

299       The sequenced sample was collected at a depth of 1,385 meters using manned  
300 submersible *Shenhaiyongshi* from the Haima cold seep in the South China Sea (16° 73.228' N,  
301 110° 46.143' E) (**Figure 1**). We sequenced the sample genome on the Nanopore and Illumina  
302 sequencing platforms. In total, 42.43 Gb of Nanopore reads and 49.19 Gb of Illumina reads  
303 were obtained (**Table S1 and S2**). Species identity of the sequenced individual was first  
304 determined according to its morphological characteristics. In addition, we assembled the  
305 mitochondrial genome of the individual using Illumina reads. The sequence identity between  
306 the published *C. heheva* mitochondrial genome and our assembled genome was 99.74%,  
307 which confirmed the species identity of the sequenced individual (S. Sun et al., 2021). Based  
308 on the *k*-mer distribution of Illumina reads, the size of the *C. heheva* genome was estimated to  
309 be 1.23 Gb with a high heterozygosity of 2% (**Figure S1 and Table S3**). The *C. heheva*  
310 genome was assembled into 4,609 contigs, with a total size of 1.107 Gb and contig N50 of  
311 1.22 Mb (**Table 1**). We determined the completeness of the assembled genome by running  
312 benchmarking universal single-copy orthologs (BUSCO) and sequencing quality assessment  
313 tool (SQUAT) software. BUSCO analysis with metazoan (obd10) gene set showed that the  
314 assembled *C. heheva* genome contained 89.6% complete single-copy orthologs (**Table S4**).  
315 Additionally, 91.1% of Illumina reads could be aligned to the assembled genome with high  
316 confidence in SQUAT analysis (**Table S5**). These results indicate the high integrity of our  
317 assembled genome.



### 318 **3.2 Genome annotation**

319 Repetitive elements represented 624.38 Mb (56.40%) in the *C. heheva* genome  
320 assembly (**Table S6**). Long interspersed nuclear elements (LINEs) were the largest class of  
321 annotated transposable elements (TEs), making up 9.72% of the genome. DNA transposons,  
322 which were the second largest class of TEs, represented 33.59 Mb (3.03%) of the genome.  
323 Additionally, the *C. heheva* genome comprised a large proportion (38.39%) of unclassified  
324 interspersed repeats. Comparative genomic analysis among *C. heheva* and other echinoderms  
325 revealed that the *C. heheva* genome consisted of the largest number of TEs (**Figure 2a and**  
326 **2b; Table S7**). Repetitive elements constituted 624.38 Mb of the *C. heheva* genome, and they  
327 accounted for 253.98 Mb and 218.2 Mb of the genomes of *A. japonicus* and *P. parvimensis*,  
328 respectively. The differences in the repeat content were almost consistent with the size  
329 differences between the genomes of *C. heheva* and the other two holothurians. This suggests  
330 that repeats contributed to the size differences among the genomes of these three holothurians.  
331 Notably, the proportion of LINEs in the *C. heheva* genome was substantially higher than that  
332 in the genomes of other echinoderms (**Figure 2b**). Kimura distance-based copy divergence  
333 analysis identified a recent expansion of LINEs in the *C. heheva* genome (**Figure 2c**).  
334 Protein-coding genes were identified in the genome of *C. heheva* through a combination of *ab*  
335 *initio* and homology-based protein prediction approaches. In total, we derived 36,527 gene  
336 models in the *C. heheva* genome. The structure of predicted genes in *C. heheva* is slightly  
337 different to that of other previously sequenced echinoderm genomes. With longer exon and

338 intron as well as more exons per gene, genes in *C. heheva* are longer than the ones in *A.*  
339 *japonicus* (**Table S8**).

340

### 341 **3.3 Phylogenomic analysis and demographic inference**

342 To investigate the evolutionary history of *C. heheva*, a maximum-likelihood (ML)  
343 phylogenetic tree was reconstructed using single-copy orthologs of *C. heheva* and 16 other  
344 deuterostomes (**Figure S2**). Consistent with the results of previous analyses, the tree showed  
345 that Echinodermata and Hemichordata were sister groups to Chordata. *Chiridota heheva*  
346 appeared sister to two other holothurians, which supports the view that Apodida is the sister  
347 taxon to the remaining holothuroids (Miller et al., 2017). In addition, divergence times were  
348 determined among 7 echinoderms that had whole genome sequences (**Figure 3a**). The  
349 divergence time of *A. japonica* and other echinoderms was estimated to be approximately 569  
350 million years (Ma), which is generally consistent with the fossil records (Smith, 1988a;  
351 Zamora et al., 2013). *Chiridota heheva* and two other holothurians were estimated to have  
352 diverged approximately 429 Ma. As Apodid is the basal taxon in Holothuroidea, these results  
353 indicate that holothurians started to diverge in the Early Ordovician (Benton & Twitchett,  
354 2003).

355

356 We studied the demographic history of the deep-sea (*C. heheva*) and shallow-water (*A.*  
357 *japonicus*) holothurians by inferring the histories of ancestral population size using the  
358 pairwise sequential Markovian coalescent (PSMC) method (**Figure 3b**). *Chiridota heheva*

359 experienced a decline in population size approximately 21 million years ago, which suggests  
360 that this species started to colonize the current habitat at the turn of the Miocene. The decline  
361 in population size in *A. japonicus* started in the late Miocene (approximately 8 Ma). *Chiridota*  
362 *heheva* also experienced a moderate decline in ancestral population size in the early Pliocene.  
363

### 364 **3.4 *Hox/ParaHox* gene clusters**

365 It has been demonstrated that *Hox* genes play a critical role in embryonic development  
366 (Pearson et al., 2005). In addition, previous studies proposed that the presence/absence and  
367 expression pattern of *Hox* genes might contribute to morphological patterning and embryonic  
368 development in echinoderms (Li et al., 2018; Zhang et al., 2017). Therefore, to determine  
369 whether *Hox* genes contribute to morphological divergence in Holothuroidea, we identified  
370 *Hox* gene clusters and their evolutionary sister complex, the *ParaHox* gene cluster, in the  
371 genomes of *C. heheva* and 6 other echinoderms (**Figure 4**). A *Hox* cluster and a *ParaHox*  
372 cluster could be identified in the genomes of all 7 species. The gene composition and  
373 arrangement of both *Hox* and *ParaHox* clusters were highly consistent between the genomes  
374 of *C. heheva* and *A. japonicus*, suggesting that *Hox/ParaHox* genes do not control the  
375 development of tube feet and respiratory trees in Apodida. *Hox4* was missing in Echinodeans  
376 and holothurians, and *Hox6* was missing in asteroideans and holothurians. These results  
377 support the view that the absence of *Hox* genes might have contributed to the morphological  
378 divergence of echinoderms.

379

### 380 **3.5 NLR repertoire in *C. heheva***

381 NACHT and leucine-rich, repeat-containing proteins (NLRs) are important components  
382 of pathogen recognition receptors (PRRs) involved in animal innate immune systems, which  
383 can perceive pathogen-associated molecular patterns (PAMPs) of viruses and bacteria (Lange  
384 et al., 2011). The bona fide NLRs contain a NACHT (NAIP, CIITA, HET-E, and TP1)  
385 domain, which belongs to the signal transduction ATPases with numerous domains (STAND)  
386 superfamily, and a series of C-terminal leucine-rich repeats (LRRs) (Ausubel, 2005; Leipe et  
387 al., 2004). The Pfam hidden Markov model (HMM) search combined with phylogenetic  
388 analysis approach identified only 53 NLRs in *C. heheva* (**Table S9**), compared with a largely  
389 expanded set of 203 NLRs in purple sea urchin, a member of the phylum Echinodermata  
390 (Hibino et al., 2006). *Chiridota heheva* contained 24 NLRs with one or more N-terminal  
391 Death/DED domain, 22 NACHT-only NLRs, 6 NLRs with other domains, including the  
392 immunoglobulin V-set domain, which was not identified in sea urchin NLRs, and only one  
393 NLR with LRRs (**Table S9**). Taken together, these results indicate that the *C. heheva* NLR  
394 repertoire shows different abundances and structural complexities than the sea urchin.

395

396 We performed phylogenetic analysis of *C. heheva* NLRs and other representative NLRs  
397 of metazoans, including humans, *Amphimedon queenslandica*, *S. purpuratus*, *Acropora*  
398 *digitifera*, *Nematostella vectensis*, *Pinctada fucata*, *Capitella teleta*, mollusks, and arthropods  
399 (Yuen et al., 2014). We found that the majority of *C. heheva* NLRs form a monophyletic  
400 lineage with sea urchin NLRs (**Figure 5**), supporting the lineage-specific evolution of NLRs

401 in Echinodermata (Zhang et al., 2010). Given that human IPAF (ice protease-activating  
402 factor) and NAIP (neuronal apoptosis inhibitory protein) proteins were reported to have  
403 originated before the evolution of vertebrates (Zhang et al., 2010), one *C. heheva* NLR  
404 clustering with these two proteins indicates that this NLR may have an ancient independent  
405 origin (**Figure 5**).

406

### 407 **3.6 Gene family evolution**

408 We performed gene-family analysis based on the phylogenetic tree of 7 echinoderms  
409 (**Figure 3a**). Compared with other echinoderms, 66 gene families were expanded, and 25  
410 gene families were contracted in *C. heheva* ( $P < 0.05$ ) (**Tables S10 and S11**). Several  
411 significantly expanded gene families are involved in the processes of cell cycle progression,  
412 protein folding, and ribosome assembly. As high hydrostatic pressure causes cell cycle delay  
413 and affects protein folding (George et al., 2007; Yancey & Siebenaller, 2015), expansion of  
414 these families may have contributed to the adaptation of *C. heheva* to cold seep environments.

415

416 Aerolysins, which are pore-forming toxins (PFTs), were first characterized as virulence  
417 factors in the pathogenic bacterium *Aeromonas hydrophyla* (Abrami et al., 2000; Dal Peraro  
418 & van der Goot, 2016). The homologs of aerolysin in eukaryotes (aerolysin-like proteins,  
419 ALPs) originated from recurrent horizontal gene transfer (HGT) (Moran et al., 2012). ALPs  
420 of different origins possess diverse functions, including immune defense and predation  
421 (Galinier et al., 2013; Szczesny et al., 2011; Xiang et al., 2014). The ALPs were significantly

422 expanded in the genome of *C. heheva* (7 copies) compared with other echinoderms (0 or 1  
423 copy) ( $P < 0.05$ ) (**Table S10**). To investigate the possible origin and function of *C. heheva*  
424 ALPs, we reconstructed the phylogenetic tree of ALPs in echinoderms and diverse species.  
425 Interestingly, *C. heheva* ALPs did not cluster with ALPs from other echinoderms, suggesting  
426 that ALPs from *C. heheva* and other echinoderms have different origins (**Figure 6**). *Chiridota*  
427 *heheva* ALPs form a clade with ALPs from sea anemones (*Nematostella vectensis* and  
428 *Ecaiptasia diaphana*). This indicates that ALPs from *C. heheva* and sea anemones might have  
429 similar biological functions. It was shown that ALPs secreted by *N. vectensis* are involved in  
430 prey digestion (Moran et al., 2012). Therefore, the expansion of the ALP family in *C. heheva*  
431 might contribute to the disintegration of microbes during digestion.

432

### 433 **3.7 Positively selected genes**

434 To better understand the genetic basis of its adaptation to a deep-sea reducing  
435 environment, we identified genes undergoing positive selection (PSGs) in *C. heheva*.  
436 Compared with 6 other echinoderms, 27 PSGs were identified in the *C. heheva* genome  
437 (**Table S12**). Several hypoxia-related genes (*PKM*, *PAN2*, *LHPP*, and *RRP9*) (Benita et al.,  
438 2009; Bett et al., 2013; Chen et al., 2021; Luo et al., 2011), were subject to positive selection  
439 in *C. heheva*. Cold seeps and hydrothermal vents are characterized by low oxygen  
440 concentrations, which are challenging for endemic species (Hourdez & Lallier, 2007).  
441 Therefore, the adaptation of *C. heheva* to a deep-sea reducing environment may be attributed  
442 to selection against these hypoxia-related genes. Interestingly, the *LHPP* gene is also

443 positively selected in the genomes of cetaceans, which are hypoxia-tolerant mammals (Tian et  
444 al., 2017). In addition, comparative genetic analysis showed that cetaceans and *C. heheva*  
445 have the same amino acid substitution at position 118 of the LHPP protein (**Figures S3 and**  
446 **S4**), which indicates a possible convergent evolution in the *LHPP* during the adaptation of  
447 cetaceans and *C. heheva* to hypoxic environments.

448

#### 449 **4. Discussion**

450 With more than 1,400 extant species, Holothuroidea is one of the largest classes in the  
451 phylum Echinodermata (Pawson, 2007). In addition, holothurians are well adapted to diverse  
452 marine environments, with habitats ranging from shallow intertidal areas to hadal trenches  
453 (Jamieson, 2015; Smirnov et al., 2000). However, due to the lack of body fossils,  
454 evolutionary study of Holothuroidea is more difficult than other classes of Echinodermata.  
455 The high-quality genome of *C. heheva* presented in this report facilitates the investigation of  
456 its evolutionary history. Our phylogenomic analysis revealed that the divergence of  
457 echinoderms started in the early Cambrian (~539 Ma), which is consistent with the fossil  
458 record. (Bottjer et al., 2006; Smith, 1988b) (**Fig. 3a**). The ancestor of *Chiridota heheva*  
459 diverged from the ancestors of two shallow-water holothurians (*A. japonicus* and *P.*  
460 *parvimensis*) approximately 429 Ma. As Apodida is the basal taxon in Holothuroidea, these  
461 results support the view that holothurians had evolved by the Early Ordovician (Reich, 2010).  
462 To better investigate the evolution of holothurians, we inferred the histories of ancestral  
463 population sizes of *C. heheva* and *A. japonicus* using PSMC (**Fig. 3b**). *Chiridota heheva*

464 experienced a decline in population size approximately 21 Ma. Ocean temperature increased  
465 slowly between the late Oligocene and early Miocene (21-27 Ma) after long-term cooling  
466 from the end of the Eocene (Zachos et al., 1997; Zachos et al., 2001). Furthermore, species  
467 diversity within Echinodermata started to increase in the early Miocene (Kroh, 2007; Oyen &  
468 Portell, 2001). These results indicate that *C. heheva* might have colonized the current habitat  
469 in the early Miocene when the climate transition improved adaptations in echinoderms. The  
470 oceans experienced a decrease in temperature during the late Miocene (7 to 5.4 Ma) (Herbert  
471 et al., 2016). A decline in ancestral population size in *A. japonicus* started approximately 7  
472 Ma. *Chiridota heheva* also experienced a moderate decline in population size in the early  
473 Pliocene. These results suggest that global cooling and environmental changes in the late  
474 Miocene were an important driver of demographic changes in both shallow-water and deep-  
475 sea holothurians.

476

477 Apodida do not have tube feet or complex respiratory trees, which are commonly found  
478 in other holothurians (Barnes, 1982). It was proposed that *Hox* genes might have contributed  
479 to the body development of echinoderms (Li et al., 2018). The gene composition and  
480 arrangement of the *Hox/ParaHox* gene cluster were consistent between *A. japonicus* and *C.*  
481 *heheva*, indicating that *Hox* genes were unlikely to have been involved in the morphological  
482 divergence between Apodids and other holothurians. There are some inconsistent results  
483 regarding the gene composition of *Hox* gene clusters in different echinoderm genomes.  
484 Previous studies found that *Hox4* and *Hox6* were missing in the genomes of holothurians (Li



485 et al., 2018; Zhang et al., 2017), and *Hox4* was missing in the genomes of echinoids  
486 (Cameron et al., 2006). Li *et al.* (2018) proposed that *Hox6* was lost before the split of  
487 Echinozoa and Asterozoa (Li et al., 2018), while Li *et al.* (2020) suggested that the loss of  
488 *Hox4* or *Hox6* was a lineage-specific event (Li et al., 2020). We found that *Hox4* and *Hox 6*  
489 were missing in the genomes of both *C. heheva* and *A. japonicus*. In addition, *Hox6* was  
490 missing in the genome of *A. planci*, and *Hox4* was missing in the genomes of both *L.*  
491 *variegatus* and *S. purpuratus* (**Fig. 4a**). This suggests that *Hox4* was lost before the split of  
492 Echinoidea and Holothuroidea, and *Hox6* was lost in Holothuroidea and Asteroidea. This  
493 scenario is not parsimonious, as Holothuroidea is paraphyletic with Asteroidea. As *S.*  
494 *purpuratus Hox6* clusters with *A. planci Hox4* in phylogenetic analysis, Baughman et al.  
495 (2014) proposed reclassifying *S. purpuratus Hox6* as *Hox4* (Baughman et al., 2014).  
496 Following this argument, *Hox6* was missing in Holothuroidea, Echinoidea, and Asteroidea,  
497 and *Hox4* was missing in Holothuroidea (**Fig. 4b**). This supports the view that the loss of  
498 *Hox6* occurred before the split of Echinozoa and Asterozoa.

499

500 Comparative genomic analysis showed that the ALP gene family was significantly  
501 expanded in *C. heheva* compared with other echinoderms. The expansion of the ALP family  
502 in *C. heheva* might have contributed to its adaptation to cold seep environments. Cold seeps  
503 are areas where methane, hydrogen sulfide, and other hydrocarbons seep or emanate as gas  
504 from deep geologic sources (Suess, 2014). Chemosynthetic microbes oxidize the reduced  
505 chemicals contained in the fluids to produce energy and fix carbon into organic matter, which

506 supports large benthic communities around the gas source (Levin, 2005). Most seep-dwelling  
507 animals survive by hosting chemosynthetic microbes (Petersen & Dubilier, 2009). *Chiridota*  
508 *heheva* has a unique feeding habit of acquiring nutrients from sediment detritus, suspended  
509 material, and wood fragments when available. The microbial communities of cold seeps are  
510 very different from those of other seafloor ecosystems (Ruff et al., 2015). Moreover, some of  
511 these microbes have unique cellular structures that might be difficult to disintegrate  
512 (Katayama et al., 2020), which impedes nutrient acquisition of *C. heheva* from free-living  
513 microbes of cold seeps. As typical pore-forming proteins, aerolysin and related proteins are  
514 found in a large variety of species and possess diverse functions (Szczesny et al., 2011). It  
515 was proposed that ALPs were derived from recurrent horizontal gene transfer. ALPs of the  
516 same origin might have similar functions (Moran et al., 2012). *Chiridota heheva* ALPs and  
517 ALPs from other echinoderms are likely to have different origins, as they were clustered with  
518 aerolysins from distinct groups of bacteria (**Figure 6**). *Chiridota heheva* ALPs formed a clade  
519 with sea anemone ALPs. Furthermore, ALPs from hydra and sea anemones are involved in  
520 prey disintegration after predation by lysing cells through pore formation on membranes  
521 (Moran et al., 2012; Sher et al., 2008). This suggests that the expansion of the ALP family  
522 might have contributed to microbe digestion in *C. heheva*, which in turn facilitated its  
523 adaptation to cold seep environments.

524

525 Several genes that are involved in hypoxic responses (*PKM*, *PAN2*, and *LHPP*) and one  
526 of the HIF-1 target genes (*PPR9*) were subjected to positive selection in *C. heheva*. The

527 transcription of the *PKM2* gene is activated by HIF-1. PKM2 promotes transactivation of  
528 HIF-1 target genes by directly interacting with the HIF-1 $\alpha$  subunit. PKM2 is involved in a  
529 feedback loop that reprograms glucose metabolism under hypoxic conditions (Luo et al.,  
530 2011). LHPP induces ubiquitin-mediated degradation of PKM2, which results in the  
531 inhibition of glycolysis under hypoxia (Chen et al., 2021). Interestingly, the LHPP was also  
532 subject to positive selection in cetaceans (Tian et al., 2017). Furthermore, both *C. heheva* and  
533 cetaceans have the same amino acid substitution at position 118 of the LHPP protein (**Figs.**  
534 **S3 and S4**). These results suggest that the two interacting genes (*PKM2* and *LHPP*) play a  
535 key role in the hypoxic adaptation of these hypoxia-tolerant marine animals.

536

537 **Acknowledgements**

538 We thank Dr. Kang Ding, and Dr. Zhimin Jian for leading the expedition of TS12-02, the  
539 crew of research vessel (R/V) *Tansuoyihao*, the pilot team of the manned submersible  
540 *Shenhaiyongshi*, and the onboard diving scientists for their technical support during the cruise.

541 We gratefully acknowledge the National Supercomputing Center in Guangzhou for provision  
542 of computational resources. This study was supported by Innovation Group Project of  
543 Southern Marine Science and Engineering Guangdong Laboratory (Zhuhai) (No. 311021006),  
544 National Natural Science Foundation of China (No. 31900309), GuangDong Basic and  
545 Applied Basic Research Foundation (No. 2019A1515011644), and National Innovation and  
546 Entrepreneurship Training Project for College Student of China (No. 20201126).

547

548 **References**

- 549 Abrami, L., Fivaz, M., & van der Goot, F. G. (2000, Apr). Adventures of a pore-forming  
550 toxin at the target cell surface. *Trends in Microbiology*, 8(4), 168-172.  
551 [https://doi.org/Doi.10.1016/S0966-842x\(00\)01722-4](https://doi.org/Doi.10.1016/S0966-842x(00)01722-4)  
552
- 553 Ausubel, F. M. (2005, Oct). Are innate immune signaling pathways in plants and animals  
554 conserved? *Nat Immunol*, 6(10), 973-979. <https://doi.org/10.1038/ni1253>  
555
- 556 Barnes, R. D. (1982). *Invertebrate Zoology*. Holt-Sauders International.  
557
- 558 Baughman, K. W., McDougall, C., Cummins, S. F., Hall, M., Degnan, B. M., Satoh, N., &  
559 Shoguchi, E. (2014, Dec). Genomic organization of Hox and ParaHox clusters in the  
560 echinoderm, *Acanthaster planci*. *Genesis*, 52(12), 952-958.  
561 <https://doi.org/10.1002/dvg.22840>  
562
- 563 Benita, Y., Kikuchi, H., Smith, A. D., Zhang, M. Q., Chung, D. C., & Xavier, R. J. (2009,  
564 Aug). An integrative genomics approach identifies Hypoxia Inducible Factor-1 (HIF-  
565 1)-target genes that form the core response to hypoxia. *Nucleic Acids Res*, 37(14),  
566 4587-4602. <https://doi.org/10.1093/nar/gkp425>  
567
- 568 Benton, M. J., & Twitchett, R. J. (2003, Jul). How to kill (almost) all life: the end-Permian  
569 extinction event. *Trends in Ecology & Evolution*, 18(7), 358-365. [https://doi.org/Doi.10.1016/S0169-5347\(03\)00093-4](https://doi.org/Doi.10.1016/S0169-5347(03)00093-4)  
570  
571
- 572 Bett, J. S., Ibrahim, A. F. M., Garg, A. K., Kelly, V., Pedrioli, P., Rocha, S., & Hay, R. T.  
573 (2013, Apr 15). The P-body component USP52/PAN2 is a novel regulator of HIF1A  
574 mRNA stability. *Biochemical Journal*, 451, 185-194.  
575 <https://doi.org/10.1042/Bj20130026>  
576
- 577 Bottjer, D. J., Davidson, E. H., Peterson, K. J., & Cameron, R. A. (2006, Nov 10).  
578 Paleogenomics of echinoderms. *Science*, 314(5801), 956-960.  
579 <https://doi.org/10.1126/science.1132310>  
580
- 581 Cameron, R. A., Rowen, L., Nesbitt, R., Bloom, S., Rast, J. P., Berney, K., Arenas-Mena, C.,  
582 Martinez, P., Lucas, S., Richardson, P. M., Davidson, E. H., Peterson, K. J., & Hood,  
583 L. (2006, Jan 15). Unusual gene order and organization of the sea urchin hox cluster. *J*  
584 *Exp Zool B Mol Dev Evol*, 306(1), 45-58. <https://doi.org/10.1002/jez.b.21070>  
585
- 586 Carney, R. S. (2010). Stable isotope trophic patterns in echinoderm megafauna in close  
587 proximity to and remote from Gulf of Mexico lower slope hydrocarbon seeps. *Deep*  
588 *Sea Research Part II: Topical Studies in Oceanography*, 57(21-23), 1965-1971.  
589 <https://doi.org/10.1016/j.dsr2.2010.09.027>

590

591 Chakraborty, M., Baldwin-Brown, J. G., Long, A. D., & Emerson, J. J. (2016, Nov 2).  
592 Contiguous and accurate de novo assembly of metazoan genomes with modest long  
593 read coverage. *Nucleic Acids Res*, 44(19), e147. <https://doi.org/10.1093/nar/gkw654>

594

595 Chen, S., Zhou, Y., Chen, Y., & Gu, J. (2018, Sep 1). fastp: an ultra-fast all-in-one FASTQ  
596 preprocessor. *Bioinformatics*, 34(17), i884-i890.  
597 <https://doi.org/10.1093/bioinformatics/bty560>

598

599 Chen, W. J., Chen, L. H., Wang, J., Wang, Z. T., Wu, C. Y., Sun, K., Ding, B. Y., Liu, N., &  
600 Xu, R. X. (2021). LHPP impedes energy metabolism by inducing ubiquitin-mediated  
601 degradation of PKM2 in glioblastoma. *Am J Cancer Res*, 11(4), 1369-1390.  
602 <https://www.ncbi.nlm.nih.gov/pubmed/33948363>  
603 <https://www.ncbi.nlm.nih.gov/pmc/articles/PMC8085851/pdf/ajcr0011-1369.pdf>

604

605 Dal Peraro, M., & van der Goot, F. G. (2016, Feb). Pore-forming toxins: ancient, but never  
606 really out of fashion. *Nature Reviews Microbiology*, 14(2), 77-92.  
607 <https://doi.org/10.1038/nrmicro.2015.3>

608

609 De Bie, T., Cristianini, N., Demuth, J. P., & Hahn, M. W. (2006, May 15). CAFE: a  
610 computational tool for the study of gene family evolution. *Bioinformatics*, 22(10),  
611 1269-1271. <https://doi.org/10.1093/bioinformatics/btl097>

612

613 Flynn, J. M., Hubley, R., Goubert, C., Rosen, J., Clark, A. G., Feschotte, C., & Smit, A. F.  
614 (2020, Apr 28). RepeatModeler2 for automated genomic discovery of transposable  
615 element families. *Proc Natl Acad Sci U S A*, 117(17), 9451-9457.  
616 <https://doi.org/10.1073/pnas.1921046117>

617

618 Galinier, R., Portela, J., Mone, Y., Allienne, J. F., Henri, H., Delbecq, S., Mitta, G., Gourbal,  
619 B., & Duval, D. (2013, Mar). Biomphalysin, a new beta pore-forming toxin involved  
620 in *Biomphalaria glabrata* immune defense against *Schistosoma mansoni*. *PLoS*  
621 *Pathog*, 9(3), e1003216. <https://doi.org/10.1371/journal.ppat.1003216>

622

623 George, V. T., Brooks, G., & Humphrey, T. C. (2007, Oct). Regulation of cell cycle and  
624 stress responses to hydrostatic pressure in fission yeast. *Mol Biol Cell*, 18(10), 4168-  
625 4179. <https://doi.org/10.1091/mbc.e06-12-1141>

626

627 Gremme, G., Brendel, V., Sparks, M. E., & Kurtz, S. (2005, Dec). Engineering a software  
628 tool for gene structure prediction in higher organisms. *Information and Software*  
629 *Technology*, 47(15), 965-978. <https://doi.org/10.1016/j.infsof.2005.09.005>

630

- 631 Guan, D., McCarthy, S. A., Wood, J., Howe, K., Wang, Y., & Durbin, R. (2020, May 1).  
632 Identifying and removing haplotypic duplication in primary genome assemblies.  
633 *Bioinformatics*, 36(9), 2896-2898. <https://doi.org/10.1093/bioinformatics/btaa025>  
634
- 635 Haas, B. J., Salzberg, S. L., Zhu, W., Pertea, M., Allen, J. E., Orvis, J., White, O., Buell, C.  
636 R., & Wortman, J. R. (2008). Automated eukaryotic gene structure annotation using  
637 EVIDENCEModeler and the program to assemble spliced alignments. *Genome Biology*,  
638 9(1). <https://doi.org/ARTN10.1186/gb-2008-9-1-r7>  
639 10.1186/gb-2008-9-1-r7  
640
- 641 Hall, M. R., Kocot, K. M., Baughman, K. W., Fernandez-Valverde, S. L., Gauthier, M. E. A.,  
642 Hatleberg, W. L., Krishnan, A., McDougall, C., Motti, C. A., Shoguchi, E., Wang, T.,  
643 Xiang, X., Zhao, M., Bose, U., Shinzato, C., Hisata, K., Fujie, M., Kanda, M.,  
644 Cummins, S. F., Satoh, N., Degnan, S. M., & Degnan, B. M. (2017, Apr 5). The  
645 crown-of-thorns starfish genome as a guide for biocontrol of this coral reef pest.  
646 *Nature*, 544(7649), 231-234. <https://doi.org/10.1038/nature22033>  
647
- 648 Herbert, T. D., Lawrence, K. T., Tzanova, A., Peterson, L. C., Caballero-Gill, R., & Kelly, C.  
649 S. (2016, Nov). Late Miocene global cooling and the rise of modern ecosystems.  
650 *Nature Geoscience*, 9(11), 843-847. <https://doi.org/10.1038/Ngeo2813>  
651
- 652 Hibino, T., Loza-Coll, M., Messier, C., Majeske, A. J., Cohen, A. H., Terwilliger, D. P.,  
653 Buckley, K. M., Brockton, V., Nair, S. V., Berney, K., Fugmann, S. D., Anderson, M.  
654 K., Pancer, Z., Cameron, R. A., Smith, L. C., & Rast, J. P. (2006, Dec 1). The immune  
655 gene repertoire encoded in the purple sea urchin genome. *Dev Biol*, 300(1), 349-365.  
656 <https://doi.org/10.1016/j.ydbio.2006.08.065>  
657
- 658 Hoang, D. T., Chernomor, O., von Haeseler, A., Minh, B. Q., & Vinh, L. S. (2018, Feb 1).  
659 UFBoot2: Improving the Ultrafast Bootstrap Approximation. *Mol Biol Evol*, 35(2),  
660 518-522. <https://doi.org/10.1093/molbev/msx281>  
661
- 662 Hourdez, S., & Lallier, F. H. (2007). Adaptations to hypoxia in hydrothermal-vent and cold-  
663 seep invertebrates. *Rev Environ Sci Biotechnol*, 6, 143-159.  
664 <https://doi.org/https://doi.org/10.1007/s11157-006-9110-3>  
665
- 666 Huerta-Cepas, J., Forslund, K., Coelho, L. P., Szklarczyk, D., Jensen, L. J., von Mering, C., &  
667 Bork, P. (2017, Aug). Fast Genome-Wide Functional Annotation through Orthology  
668 Assignment by eggNOG-Mapper. *Mol Biol Evol*, 34(8), 2115-2122.  
669 <https://doi.org/10.1093/molbev/msx148>  
670
- 671 Huerta-Cepas, J., Szklarczyk, D., Heller, D., Hernandez-Plaza, A., Forslund, S. K., Cook, H.,  
672 Mende, D. R., Letunic, I., Rattei, T., Jensen, L. J., von Mering, C., & Bork, P. (2019,  
673 Jan 8). eggNOG 5.0: a hierarchical, functionally and phylogenetically annotated

- 674 orthology resource based on 5090 organisms and 2502 viruses. *Nucleic Acids Res*,  
675 47(D1), D309-D314. <https://doi.org/10.1093/nar/gky1085>
- 676
- 677 Jamieson, A. (2015). *The hadal zone: life in the deepest ocean*. Cambridge University Press.
- 678
- 679 Kalyaanamoorthy, S., Minh, B. Q., Wong, T. K. F., von Haeseler, A., & Jermini, L. S. (2017,  
680 Jun). ModelFinder: fast model selection for accurate phylogenetic estimates. *Nature*  
681 *Methods*, 14(6), 587-589. <https://doi.org/10.1038/nmeth.4285>
- 682
- 683 Kanehisa, M., Sato, Y., & Morishima, K. (2016, Feb 22). BlastKOALA and GhostKOALA:  
684 KEGG Tools for Functional Characterization of Genome and Metagenome Sequences.  
685 *J Mol Biol*, 428(4), 726-731. <https://doi.org/10.1016/j.jmb.2015.11.006>
- 686
- 687 Katayama, T., Nobu, M. K., Kusada, H., Meng, X. Y., Hosogi, N., Uematsu, K., Yoshioka,  
688 H., Kamagata, Y., & Tamaki, H. (2020, Dec 14). Isolation of a member of the  
689 candidate phylum 'Atribacteria' reveals a unique cell membrane structure. *Nature*  
690 *Communications*, 11(1). <https://doi.org/ARTN> 6381  
691 10.1038/s41467-020-20149-5
- 692
- 693 Katoh, K., Misawa, K., Kuma, K., & Miyata, T. (2002, Jul 15). MAFFT: a novel method for  
694 rapid multiple sequence alignment based on fast Fourier transform. *Nucleic Acids Res*,  
695 30(14), 3059-3066. <https://doi.org/10.1093/nar/gkf436>
- 696
- 697 Kroh, A. (2007, Sep 14). Climate changes in the Early to Middle Miocene of the Central  
698 Paratethys and the origin of its echinoderm fauna. *Palaeogeography*  
699 *Palaeoclimatology Palaeoecology*, 253(1-2), 169-207.  
700 <https://doi.org/10.1016/j.palaeo.2007.03.039>
- 701
- 702 Kudtarkar, P., & Cameron, R. A. (2017, Jan 1). Echinobase: an expanding resource for  
703 echinoderm genomic information. *Database (Oxford)*, 2017.  
704 <https://doi.org/10.1093/database/bax074>
- 705
- 706 Lacey, K. M. J., McCormack, G. P., Keegan, B. F., & Powell, R. (2005). Phylogenetic  
707 relationships within the class holothuroidea, inferred from 18S rRNA gene data.  
708 *Marine Biology*, 147(5), 1149-1154. <https://doi.org/10.1007/s00227-005-0009-2>
- 709
- 710 Lange, C., Hemmrich, G., Klostermeier, U. C., Lopez-Quintero, J. A., Miller, D. J., Rahn, T.,  
711 Weiss, Y., Bosch, T. C. G., & Rosenstiel, P. (2011, May). Defining the Origins of the  
712 NOD-Like Receptor System at the Base of Animal Evolution. *Mol Biol Evol*, 28(5),  
713 1687-1702. <https://doi.org/10.1093/molbev/msq349>
- 714
- 715 Leipe, D. D., Koonin, E. V., & Aravind, L. (2004, Oct 8). STAND, a class of P-loop NTPases  
716 including animal and plant regulators of programmed cell death: multiple, complex



- 717 domain architectures, unusual phyletic patterns, and evolution by horizontal gene  
718 transfer. *J Mol Biol*, 343(1), 1-28. <https://doi.org/10.1016/j.jmb.2004.08.023>  
719
- 720 Levin, L. A. (2005). Ecology of cold seep sediments: interactions of fauna with flow,  
721 chemistry and microbes. In *Oceanography and marine biology* (pp. 11-56). CRC  
722 Press.  
723
- 724 Li, H., & Durbin, R. (2009, Jul 15). Fast and accurate short read alignment with Burrows-  
725 Wheeler transform. *Bioinformatics*, 25(14), 1754-1760.  
726 <https://doi.org/10.1093/bioinformatics/btp324>  
727
- 728 Li, H., & Durbin, R. (2011, Jul 13). Inference of human population history from individual  
729 whole-genome sequences. *Nature*, 475(7357), 493-496.  
730 <https://doi.org/10.1038/nature10231>  
731
- 732 Li, H., Handsaker, B., Wysoker, A., Fennell, T., Ruan, J., Homer, N., Marth, G., Abecasis, G.,  
733 Durbin, R., & Genome Project Data Processing, S. (2009, Aug 15). The Sequence  
734 Alignment/Map format and SAMtools. *Bioinformatics*, 25(16), 2078-2079.  
735 <https://doi.org/10.1093/bioinformatics/btp352>  
736
- 737 Li, L., Stoeckert, C. J., Jr., & Roos, D. S. (2003, Sep). OrthoMCL: identification of ortholog  
738 groups for eukaryotic genomes. *Genome Res*, 13(9), 2178-2189.  
739 <https://doi.org/10.1101/gr.1224503>  
740
- 741 Li, Y., Omori, A., Flores, R. L., Satterfield, S., Nguyen, C., Ota, T., Tsurugaya, T., Ikuta, T.,  
742 Ikeo, K., Kikuchi, M., Leong, J. C. K., Reich, A., Hao, M., Wan, W., Dong, Y., Ren,  
743 Y., Zhang, S., Zeng, T., Uesaka, M., Uchida, Y., Li, X., Shibata, T. F., Bino, T.,  
744 Ogawa, K., Shigenobu, S., Kondo, M., Wang, F., Chen, L., Wessel, G., Saiga, H.,  
745 Cameron, R. A., Livingston, B., Bradham, C., Wang, W., & Irie, N. (2020, Jul 10).  
746 Genomic insights of body plan transitions from bilateral to pentamerous symmetry in  
747 Echinoderms. *Communications Biology*, 3(1), 371. <https://doi.org/10.1038/s42003-020-1091-1>  
748  
749
- 750 Li, Y., Tassia, M. G., Waits, D. S., Bogantes, V. E., David, K. T., & Halanych, K. M. (2019,  
751 Nov 18). Genomic adaptations to chemosymbiosis in the deep-sea seep-dwelling  
752 tubeworm *Lamellibrachia luymesii*. *BMC Biol*, 17(1), 91.  
753 <https://doi.org/10.1186/s12915-019-0713-x>  
754
- 755 Li, Y. L., Wang, R. J., Xun, X. G., Wang, J., Bao, L. S., Thimmappa, R., Ding, J., Jiang, J.  
756 W., Zhang, L. H., Li, T. Q., Lv, J., Mu, C., Hu, X. L., Zhang, L. L., Liu, J., Li, Y. Q.,  
757 Yao, L. J., Jiao, W. Q., Wang, Y. F., Lian, S. S., Zhao, Z. L., Zhan, Y. Y., Huang, X.  
758 T., Liao, H., Wang, J., Sun, H. Z., Mi, X., Xia, Y., Xing, Q., Lu, W., Osbourn, A.,  
759 Zhou, Z. C., Chang, Y. Q., Bao, Z. M., & Wang, S. (2018, Jun 26). Sea cucumber

- 760 genome provides insights into saponin biosynthesis and aestivation regulation. *Cell*  
761 *Discovery*, 4. <https://doi.org/ARTN> 29  
762 10.1038/s41421-018-0030-5  
763
- 764 Liu, R., Wang, K., Liu, J., Xu, W., Zhou, Y., Zhu, C., Wu, B., Li, Y., Wang, W., He, S., Feng,  
765 C., & Zhang, H. (2020, Jun 1). De Novo Genome Assembly of Limpet *Bathycyba*  
766 *lactea* (Gastropoda: Pectinodontidae): The First Reference Genome of a Deep-Sea  
767 Gastropod Endemic to Cold Seeps. *Genome Biology and Evolution*, 12(6), 905-910.  
768 <https://doi.org/10.1093/gbe/evaa100>  
769
- 770 Luo, W. B., Hu, H. X., Chang, R., Zhong, J., Knabel, M., O'Meally, R., Cole, R. N., Pandey,  
771 A., & Semenza, G. L. (2011, May 27). Pyruvate Kinase M2 Is a PHD3-Stimulated  
772 Coactivator for Hypoxia-Inducible Factor 1. *Cell*, 145(5), 732-744.  
773 <https://doi.org/10.1016/j.cell.2011.03.054>  
774
- 775 Macias, L. G., Barrio, E., & Toft, C. (2020, Dec). GWideCodeML: A Python Package for  
776 Testing Evolutionary Hypotheses at the Genome-Wide Level. *G3-Genes Genomes*  
777 *Genetics*, 10(12), 4369-4372. <https://doi.org/10.1534/g3.120.401874>  
778
- 779 Marcais, G., & Kingsford, C. (2011, Mar 15). A fast, lock-free approach for efficient parallel  
780 counting of occurrences of k-mers. *Bioinformatics*, 27(6), 764-770.  
781 <https://doi.org/10.1093/bioinformatics/btr011>  
782
- 783 Marletaz, F., Peijnenburg, K. T. C. A., Goto, T., Satoh, N., & Rokhsar, D. S. (2019, Jan 21).  
784 A New Spiralian Phylogeny Places the Enigmatic Arrow Worms among Gnathiferans.  
785 *Curr Biol*, 29(2), 312-+. <https://doi.org/10.1016/j.cub.2018.11.042>  
786
- 787 Meng, G., Li, Y., Yang, C., & Liu, S. (2019, Jun 20). MitoZ: a toolkit for animal  
788 mitochondrial genome assembly, annotation and visualization. *Nucleic Acids Res*,  
789 47(11), e63. <https://doi.org/10.1093/nar/gkz173>  
790
- 791 Miller, A. K., Kerr, A. M., Paulay, G., Reich, M., Wilson, N. G., Carvajal, J. I., & Rouse, G.  
792 W. (2017, Jun). Molecular phylogeny of extant Holothuroidea (Echinodermata). *Mol*  
793 *Phylogenet Evol*, 111, 110-131. <https://doi.org/10.1016/j.ympev.2017.02.014>  
794
- 795 Minh, B. Q., Schmidt, H. A., Chernomor, O., Schrempf, D., Woodhams, M. D., von Haeseler,  
796 A., & Lanfear, R. (2020, May 1). IQ-TREE 2: New Models and Efficient Methods for  
797 Phylogenetic Inference in the Genomic Era. *Mol Biol Evol*, 37(5), 1530-1534.  
798 <https://doi.org/10.1093/molbev/msaa015>  
799
- 800 Mooi, R., & David, B. (2008). Radial Symmetry, the Anterior/Posterior Axis, and  
801 Echinoderm Hox Genes. *Annual Review of Ecology, Evolution, and Systematics*, Vol  
802 46, 39, 43-62. <https://doi.org/10.1146/annurev.ecolsys.39.110707.173521>

803

804 Moran, Y., Fredman, D., Szczesny, P., Grynberg, M., & Technau, U. (2012, Sep). Recurrent  
805 horizontal transfer of bacterial toxin genes to eukaryotes. *Mol Biol Evol*, 29(9), 2223-  
806 2230. <https://doi.org/10.1093/molbev/mss089>

807

808 Oyen, C. W., & Portell, R. W. (2001, Feb 1). Diversity patterns and biostratigraphy of  
809 Cenozoic echinoderms from Florida. *Palaeogeography Palaeoclimatology*  
810 *Palaeoecology*, 166(1-2), 193-218. <https://doi.org/Doi> 10.1016/S0031-  
811 0182(00)00209-1

812

813 Pawson, D. L. (2007). Phylum Echinodermata. *Zootaxa*, 1668, 749-764.

814

815 Pawson, D. L., & Vance, D. J. (2004). Chirodota heheva, new species, from western Atlantic  
816 deep-sea cold seeps and anthropogenic habits (Echinodermata: Holothuroidea:  
817 Apodida). *Zootaxa*, 534, 1-12.

818

819 Pearson, J. C., Lemons, D., & McGinnis, W. (2005, Dec). Modulating Hox gene functions  
820 during animal body patterning. *Nat Rev Genet*, 6(12), 893-904.  
821 <https://doi.org/10.1038/nrg1726>

822

823 Pechenik, J. A. (2015). *Biology of the Invertebrates*. McGraw-Hill.

824

825 Petersen, J. M., & Dubilier, N. (2009, Oct). Methanotrophic symbioses in marine  
826 invertebrates. *Environ Microbiol Rep*, 1(5), 319-335. [https://doi.org/10.1111/j.1758-  
827 2229.2009.00081.x](https://doi.org/10.1111/j.1758-2229.2009.00081.x)

828

829 Price, M. N., Dehal, P. S., & Arkin, A. P. (2010, Mar 10). FastTree 2--approximately  
830 maximum-likelihood trees for large alignments. *PLoS One*, 5(3), e9490.  
831 <https://doi.org/10.1371/journal.pone.0009490>

832

833 Reich, M. (2010, Dec). The oldest synallactid sea cucumber (Echinodermata: Holothuroidea:  
834 Aspidochirotida). *Palaeontologische Zeitschrift*, 84(4), 541-546.  
835 <https://doi.org/10.1007/s12542-010-0067-8>

836

837 Ruan, J., & Li, H. (2020, Feb). Fast and accurate long-read assembly with wtdbg2. *Nature*  
838 *Methods*, 17(2), 155-158. <https://doi.org/10.1038/s41592-019-0669-3>

839

840 Ruff, S. E., Biddle, J. F., Teske, A. P., Knittel, K., Boetius, A., & Ramette, A. (2015, Mar 31).  
841 Global dispersion and local diversification of the methane seep microbiome. *Proc Natl*  
842 *Acad Sci U S A*, 112(13), 4015-4020. <https://doi.org/10.1073/pnas.1421865112>

843

- 844 Sanderson, M. J. (2003, Jan 22). r8s: inferring absolute rates of molecular evolution and  
845 divergence times in the absence of a molecular clock. *Bioinformatics*, 19(2), 301-302.  
846 <https://doi.org/10.1093/bioinformatics/19.2.301>  
847
- 848 Shafin, K., Pesout, T., Lorig-Roach, R., Haukness, M., Olsen, H. E., Bosworth, C.,  
849 Armstrong, J., Tigyi, K., Maurer, N., Koren, S., Sedlazeck, F. J., Marschall, T.,  
850 Mayes, S., Costa, V., Zook, J. M., Liu, K. J., Kilburn, D., Sorensen, M., Munson, K.  
851 M., Vollger, M. R., Monlong, J., Garrison, E., Eichler, E. E., Salama, S., Haussler, D.,  
852 Green, R. E., Akeson, M., Phillippy, A., Miga, K. H., Carnevali, P., Jain, M., & Paten,  
853 B. (2020, Sep). Nanopore sequencing and the Shasta toolkit enable efficient de novo  
854 assembly of eleven human genomes. *Nat Biotechnol*, 38(9), 1044-1053.  
855 <https://doi.org/10.1038/s41587-020-0503-6>  
856
- 857 Sher, D., Fishman, Y., Melamed-Book, N., Zhang, M., & Zlotkin, E. (2008, Jan). Osmotically  
858 driven prey disintegration in the gastrovascular cavity of the green hydra by a pore-  
859 forming protein. *FASEB J*, 22(1), 207-214. <https://doi.org/10.1096/fj.07-9133com>  
860
- 861 Simao, F. A., Waterhouse, R. M., Ioannidis, P., Kriventseva, E. V., & Zdobnov, E. M. (2015,  
862 Oct 1). BUSCO: assessing genome assembly and annotation completeness with  
863 single-copy orthologs. *Bioinformatics*, 31(19), 3210-3212.  
864 <https://doi.org/10.1093/bioinformatics/btv351>  
865
- 866 Smirnov, A. V., Gebruk, A. V., Galkin, S. V., & Shank, T. (2000). New species of  
867 holothurian (Echinodermata: Holothuroidea) from hydrothermal vent habitats. *J. Mar.*  
868 *Biol. Ass. U.K.*, 80(2), 321-328. <https://doi.org/10.1017/s0025315499001897>  
869
- 870 Smith, A. B. (1988a). Fossil evidence for the relationships of extant echinoderm classes and  
871 their time of divergence. In C. R. C. Paul & A. B. Smith (Eds.), *Echinoderm*  
872 *phylogeny and evolutionary biology* (pp. 85-97). Clarendon Press.  
873
- 874 Smith, A. B. (1988b). Fossil evidence for the relationships of extant echinoderm classes and  
875 their times of divergence. In C. R. C. Paul & A. B. Smith (Eds.), *Echinoderm*  
876 *phylogeny and evolutionary biology* (pp. 85-97). Clarendon Press.  
877
- 878 Smith, A. B., Zamora, S., & Alvaro, J. J. (2013, Jan). The oldest echinoderm faunas from  
879 Gondwana show that echinoderm body plan diversification was rapid. *Nature*  
880 *Communications*, 4. <https://doi.org/ARTN> 1385  
881 10.1038/ncomms2391  
882
- 883 Stanke, M., Schoffmann, O., Morgenstern, B., & Waack, S. (2006, Feb 9). Gene prediction in  
884 eukaryotes with a generalized hidden Markov model that uses hints from external  
885 sources. *BMC Bioinformatics*, 7. <https://doi.org/Artn> 62  
886 10.1186/1471-2105-7-62

887

888 Star, B., Nederbragt, A. J., Jentoft, S., Grimholt, U., Malmstrom, M., Gregers, T. F., Rounge,  
889 T. B., Paulsen, J., Solbakken, M. H., Sharma, A., Wetten, O. F., Lanzen, A., Winer,  
890 R., Knight, J., Vogel, J. H., Aken, B., Andersen, O., Lagesen, K., Tooming-  
891 Klunderud, A., Edvardsen, R. B., Tina, K. G., Espelund, M., Nepal, C., Previti, C.,  
892 Karlsen, B. O., Moum, T., Skage, M., Berg, P. R., Gjoen, T., Kuhl, H., Thorsen, J.,  
893 Malde, K., Reinhardt, R., Du, L., Johansen, S. D., Searle, S., Lien, S., Nilsen, F.,  
894 Jonassen, I., Omholt, S. W., Stenseth, N. C., & Jakobsen, K. S. (2011, Sep 8). The  
895 genome sequence of Atlantic cod reveals a unique immune system. *Nature*,  
896 477(7363), 207-210. <https://doi.org/10.1038/nature10342>

897

898 Steenwyk, J. L., Buida, T. J., 3rd, Li, Y., Shen, X. X., & Rokas, A. (2020, Dec). ClipKIT: A  
899 multiple sequence alignment trimming software for accurate phylogenomic inference.  
900 *PLoS Biol*, 18(12), e3001007. <https://doi.org/10.1371/journal.pbio.3001007>

901

902 Suess, E. (2014, Oct). Marine cold seeps and their manifestations: geological control,  
903 biogeochemical criteria and environmental conditions. *International Journal of Earth*  
904 *Sciences*, 103(7), 1889-1916. <https://doi.org/10.1007/s00531-014-1010-0>

905

906 Sun, J., Chen, C., Miyamoto, N., Li, R., Sigwart, J. D., Xu, T., Sun, Y., Wong, W. C., Ip, J. C.  
907 H., Zhang, W., Lan, Y., Bissessur, D., Watsuji, T. O., Watanabe, H. K., Takaki, Y.,  
908 Ikeo, K., Fujii, N., Yoshitake, K., Qiu, J. W., Takai, K., & Qian, P. Y. (2020, Apr 8).  
909 The Scaly-foot Snail genome and implications for the origins of biomineralised  
910 armour. *Nature Communications*, 11(1), 1657. <https://doi.org/10.1038/s41467-020-15522-3>

911

912  
913 Sun, J., Zhang, Y., Xu, T., Zhang, Y., Mu, H. W., Zhang, Y. J., Lan, Y., Fields, C. J., Hui, J.  
914 H. L., Zhang, W. P., Li, R. S., Nong, W. Y., Cheung, F. K. M., Qiu, J. W., & Qian, P.  
915 Y. (2017, May). Adaptation to deep-sea chemosynthetic environments as revealed by  
916 mussel genomes. *Nature Ecology & Evolution*, 1(5). <https://doi.org/ARTN 0121>  
917 10.1038/s41559-017-0121

918

919 Sun, S., Sha, Z., & Xiao, N. (2021, Apr 22). The first two complete mitogenomes of the order  
920 Apodida from deep-sea chemoautotrophic environments: New insights into the gene  
921 rearrangement, origin and evolution of the deep-sea sea cucumbers. *Comp Biochem*  
922 *Physiol Part D Genomics Proteomics*, 39, 100839.  
923 <https://doi.org/10.1016/j.cbd.2021.100839>

924

925 Sun, Y., Sun, J., Yang, Y., Lan, Y., Ip, J. C., Wong, W. C., Kwan, Y. H., Zhang, Y., Han, Z.,  
926 Qiu, J. W., & Qian, P. Y. (2021, Jul 13). Genomic signatures supporting the symbiosis  
927 and formation of chitinous tube in the deep-sea tubeworm *Paraescarpia echinospica*.  
928 *Mol Biol Evol*. <https://doi.org/10.1093/molbev/msab203>

929

- 930 Szczesny, P., Iacovache, I., Muszewska, A., Ginalski, K., van der Goot, F. G., & Grynberg,  
931 M. (2011). Extending the aerolysin family: from bacteria to vertebrates. *PLoS One*,  
932 6(6), e20349. <https://doi.org/10.1371/journal.pone.0020349>  
933
- 934 Tessmar-Raible, K., & Arendt, D. (2003, Aug). Emerging systems: between vertebrates and  
935 arthropods, the Lophotrochozoa. *Current Opinion in Genetics & Development*, 13(4),  
936 331-340. [https://doi.org/10.1016/S0959-437x\(03\)00086-8](https://doi.org/10.1016/S0959-437x(03)00086-8)  
937
- 938 Thomas, E. A., Liu, R. Y., Amon, D., Copley, J. T., Glover, A. G., Helyar, S. J., Olu, K.,  
939 Wiklund, H., Zhang, H. B., & Sigwart, J. D. (2020, Nov 20). Chiridota heheva-the  
940 cosmopolitan holothurian. *Marine Biodiversity*, 50(6). <https://doi.org/ARTN> 110  
941 10.1007/s12526-020-01128-x  
942
- 943 Tian, R., Yin, D., Liu, Y., Seim, I., Xu, S., & Yang, G. (2017). Adaptive Evolution of Energy  
944 Metabolism-Related Genes in Hypoxia-Tolerant Mammals. *Front Genet*, 8, 205.  
945 <https://doi.org/10.3389/fgene.2017.00205>  
946
- 947 Tunnicliffe, V. (1992). The nature and origin of the modern hydrothermal vent fauna. *Palaios*,  
948 7(4), 338-350. <https://doi.org/http://doi.org/10.2307/3514820>  
949
- 950 Twitchett, R. J., & Oji, T. (2005). Early Triassic recovery of echinoderms. *C. R. Palevol*, 4(6-  
951 7), 531-542. <https://doi.org/10.1016/j.crpv.2005.02.006>  
952
- 953 Urbach, J. M., & Ausubel, F. M. (2017, Jan 31). The NBS-LRR architectures of plant R-  
954 proteins and metazoan NLRs evolved in independent events. *Proc Natl Acad Sci U S*  
955 *A*, 114(5), 1063-1068. <https://doi.org/10.1073/pnas.1619730114>  
956
- 957 Van Dover, C. L., German, C. R., Speer, K. G., Parson, L. M., & Vrijenhoek, R. C. (2002,  
958 Feb 15). Evolution and biogeography of deep-sea vent and seep invertebrates. *Science*,  
959 295(5558), 1253-1257. <https://doi.org/10.1126/science.1067361>  
960
- 961 Vanreusel, A., Andersen, A. C., Boetius, A., Connelly, D., Cunha, M. R., Decker, C., Hilario,  
962 A., K.A., K., Maignien, L., Olu, K., Pachiadaki, M., Ritt, B., Rodrigus, C., Sarrazin,  
963 J., Tyler, P., Van Gaever, S., & Vanneste, H. (2009). Biodiversity of cold seep  
964 ecosystems along the European margins. *Oceanography*, 22(1), 110-127.  
965
- 966 Vaser, R., Sovic, I., Nagarajan, N., & Sikic, M. (2017, May). Fast and accurate de novo  
967 genome assembly from long uncorrected reads. *Genome Res*, 27(5), 737-746.  
968 <https://doi.org/10.1101/gr.214270.116>  
969
- 970 Walker, B. J., Abeel, T., Shea, T., Priest, M., Abouelliel, A., Sakthikumar, S., Cuomo, C. A.,  
971 Zeng, Q., Wortman, J., Young, S. K., & Earl, A. M. (2014). Pilon: an integrated tool

- 972 for comprehensive microbial variant detection and genome assembly improvement.  
973 *PLoS One*, 9(11), e112963. <https://doi.org/10.1371/journal.pone.0112963>  
974
- 975 Xiang, Y., Yan, C., Guo, X., Zhou, K., Li, S., Gao, Q., Wang, X., Zhao, F., Liu, J., Lee, W.  
976 H., & Zhang, Y. (2014, May 6). Host-derived, pore-forming toxin-like protein and  
977 trefoil factor complex protects the host against microbial infection. *Proc Natl Acad Sci*  
978 *U S A*, 111(18), 6702-6707. <https://doi.org/10.1073/pnas.1321317111>  
979
- 980 Yancey, P. H., & Siebenaller, J. F. (2015, Jun). Co-evolution of proteins and solutions:  
981 protein adaptation versus cytoprotective micromolecules and their roles in marine  
982 organisms. *J Exp Biol*, 218(12), 1880-1896. <https://doi.org/10.1242/jeb.114355>  
983
- 984 Yang, L. A., Chang, Y. J., Chen, S. H., Lin, C. Y., & Ho, J. M. (2019, Apr 18). SQUAT: a  
985 Sequencing Quality Assessment Tool for data quality assessments of genome  
986 assemblies. *Bmc Genomics*, 19(Suppl 9), 238. <https://doi.org/10.1186/s12864-019-5445-3>  
987  
988
- 989 Yuen, B., Bayes, J. M., & Degnan, S. M. (2014, Jan). The Characterization of Sponge NLRs  
990 Provides Insight into the Origin and Evolution of This Innate Immune Gene Family in  
991 Animals. *Mol Biol Evol*, 31(1), 106-120. <https://doi.org/10.1093/molbev/mst174>  
992
- 993 Zachos, J., Flower, B., & Paul, H. (1997). Orbitally paced climate oscillations across the  
994 Oligocene/Miocene boundary. *Nature*, 388, 567-570.  
995 <https://doi.org/https://doi.org/10.1038/41528>  
996
- 997 Zachos, J., Pagani, M., Sloan, L., Thomas, E., & Billups, K. (2001, Apr 27). Trends, rhythms,  
998 and aberrations in global climate 65 Ma to present. *Science*, 292(5517), 686-693.  
999 <https://doi.org/10.1126/science.1059412>  
1000
- 1001 Zamora, S., Lefebvre, B., Álvaro, J. J., Clausen, S., Elicki, O., Fatka, O., Jell, P., Kouchinski,  
1002 A., Lin, J.-P., Nardin, E., Parsley, R., Rozhnov, S., Sprinkle, J., Sumrall, C. D.,  
1003 Vizcaíno, D., & Smith, A. B. (2013). Global Cambrian echinoderm diversity and  
1004 palaeobiogeography. In D. A. T. Harper & T. Servais (Eds.), *Early Palaeozoic*  
1005 *biogeography and palaeogeography* (Vol. 38, pp. 151-164). Geological Society.  
1006
- 1007 Zhang, D., Gao, F., Jakovlic, I., Zou, H., Zhang, J., Li, W. X., & Wang, G. T. (2020, Jan).  
1008 PhyloSuite: An integrated and scalable desktop platform for streamlined molecular  
1009 sequence data management and evolutionary phylogenetics studies. *Molecular*  
1010 *Ecology Resources*, 20(1), 348-355. <https://doi.org/10.1111/1755-0998.13096>  
1011
- 1012 Zhang, Q., Zmasek, C. M., & Godzik, A. (2010, May). Domain architecture evolution of  
1013 pattern-recognition receptors. *Immunogenetics*, 62(5), 263-272.  
1014 <https://doi.org/10.1007/s00251-010-0428-1>

1015

1016 Zhang, X. J., Sun, L. N., Yuan, J. B., Sun, Y. M., Gao, Y., Zhang, L. B., Li, S. H., Dai, H.,  
1017 Hamel, J. F., Liu, C. Z., Yu, Y., Liu, S. L., Lin, W. C., Guo, K. M., Jin, S. J., Xu, P.,  
1018 Storey, K. B., Huan, P., Zhang, T., Zhou, Y., Zhang, J. Q., Lin, C. G., Li, X. N., Xing,  
1019 L. L., Huo, D., Sun, M. Z., Wang, L., Mercier, A., Li, F. H., Yang, H. S., & Xiang, J.  
1020 H. (2017, Oct). The sea cucumber genome provides insights into morphological  
1021 evolution and visceral regeneration. *Plos Biology*, *15*(10). <https://doi.org/ARTN>  
1022 e2003790

1023 [10.1371/journal.pbio.2003790](https://doi.org/10.1371/journal.pbio.2003790)

1024

1025 Zhong, Y. F., Butts, T., & Holland, P. W. (2008, Sep-Oct). HomeoDB: a database of  
1026 homeobox gene diversity. *Evol Dev*, *10*(5), 516-518. [https://doi.org/10.1111/j.1525-](https://doi.org/10.1111/j.1525-142X.2008.00266.x)  
1027 [142X.2008.00266.x](https://doi.org/10.1111/j.1525-142X.2008.00266.x)

1028

1029

1030



1031 **Data Accessibility**

1032 Raw reads and genome assembly are accessible in NCBI under BioProject number  
1033 PRJNA752986. Assembled genome sequences are accessible under Whole Genome Shotgun  
1034 project number JAIGNY000000000. Raw reads and genome assembly are also available at  
1035 the CNGB Sequence Archive (CNSA) of China National GeneBank DataBase (CNGBdb)  
1036 with accession number CNP0002134. The genome assembly and related annotation files are  
1037 available at Figshare (<https://doi.org/10.6084/m9.figshare.15302229>).

1038

1039 **Author Contributions**

1040 M.W and J.G.H. conceived of the project and designed research; J.H. collected the sample;  
1041 P.T., L.Z, Y.M., Q.C., Q.Z., L.Z. assembled and annotated the genome; L.Z., Z.G., J.H.,  
1042 M.W., S.Q., Y.W. performed the evolutionary analyses; M.W., G.H. wrote the paper the  
1043 manuscript with the contribution from all authors.

1044

1045 **Table 1 Genome assembly statistics of *C. heheva* and *A. japonicus***

1046

|                                   | <i>C. heheva</i> | <i>A. japonicus</i><br>(Li et al., 2018) | <i>A. japonicus</i><br>(Zhang et al., 2017) |
|-----------------------------------|------------------|------------------------------------------|---------------------------------------------|
| <b>Estimated genome size (Gb)</b> | ~1.23            | ~1.0                                     | ~1.0                                        |
| <b>Assembled genome size (bp)</b> | 1,106,937,276    | 952,279,490                              | 804,993,085                                 |
| <b>Number of contigs</b>          | 4,609            | 21,303                                   | 7,058                                       |
| <b>Contig N50 (bp)</b>            | 1,221,604        | 45,411                                   | 190,269                                     |
| <b>Scaffold N50 (bp)</b>          | -                | 195,518                                  | 486,650                                     |

1047

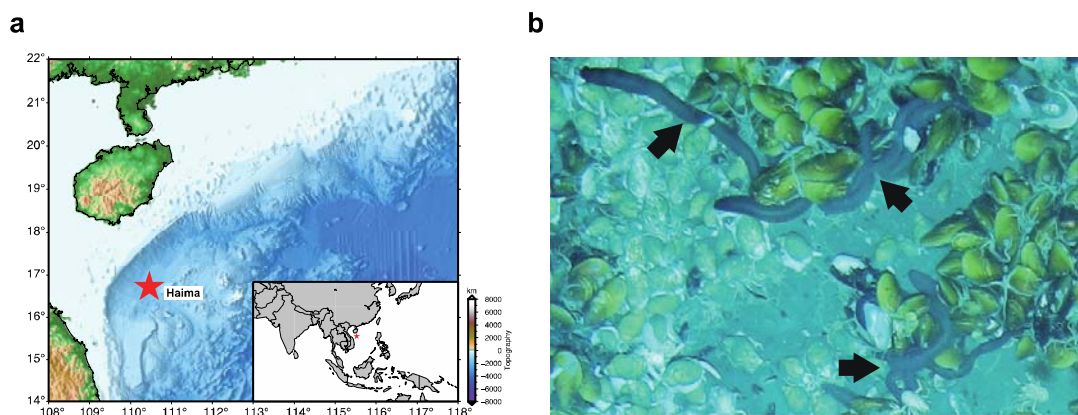

1048

1049 **Figure 1.** Collection of *C. heheva*. (a) Map showing the sampling site at the Haima cold seep  
1050 of northern South China Sea (16° 73.228' N, 110° 46.143' E). (b) *C. heheva* at the sampling  
1051 site (depth: 1,385 m), where they cohabit with deep-sea mussels. *C. heheva* individuals are  
1052 indicated by black arrows.

1053

1054

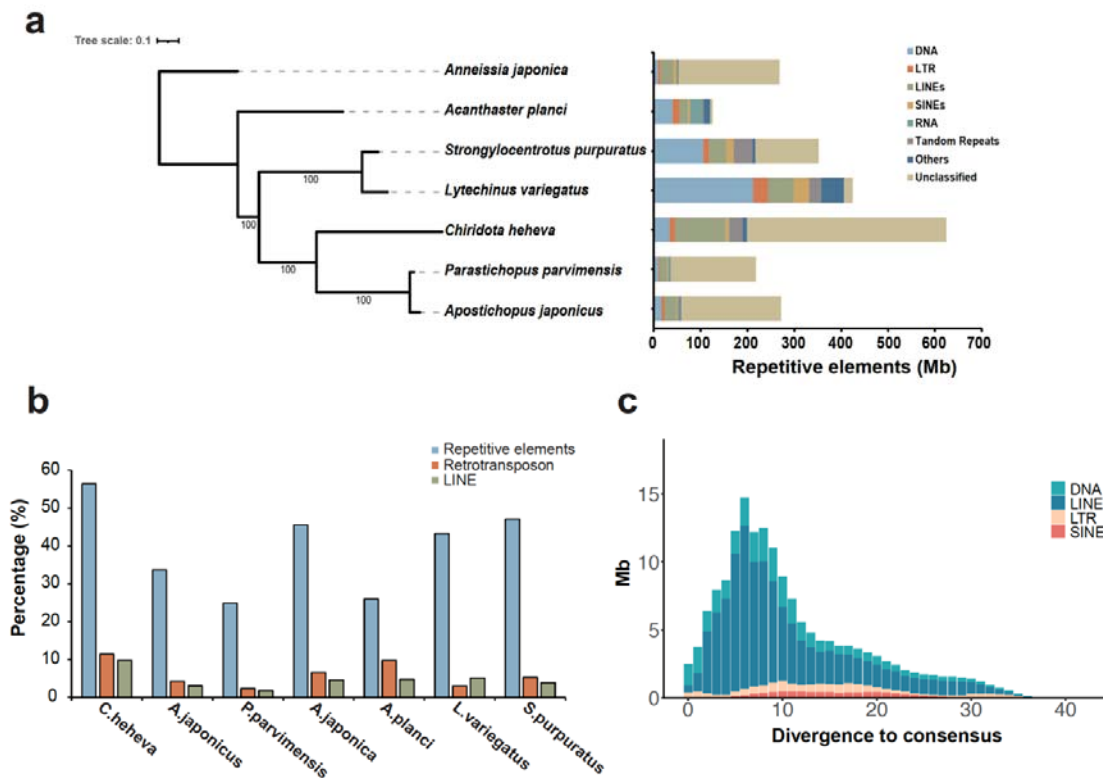

1055

1056 **Figure 2. Landscape of transposable elements in echinoderm genomes.** (a) Comparison of  
 1057 the occurrence and composition of repetitive elements in the genomes of 7 echinoderms. (b)  
 1058 Comparison of the proportion of repetitive elements, retrotransposon, and long interspersed  
 1059 nuclear elements (LINEs) in the genomes of 7 echinoderms. The proportions of repetitive  
 1060 elements and LINEs are higher in the genome of *C. heheva* than that in other echinoderms. (c)  
 1061 Transposable element accumulation profile in *C. heheva* genome. A recent burst of LINEs  
 1062 was observed in *C. heheva*.

1063

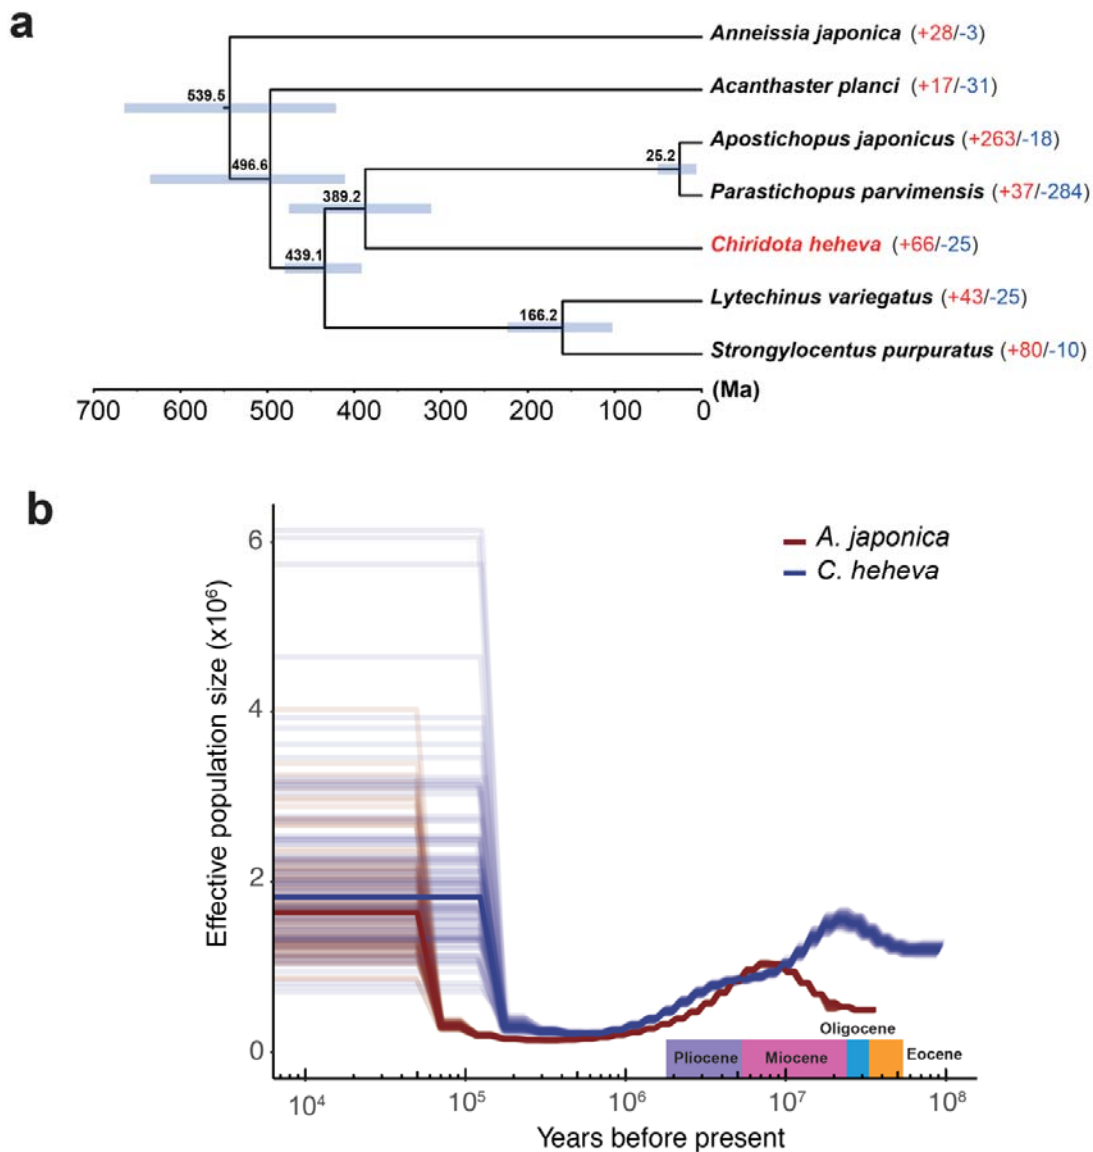

1064

1065

1066 **Figure 3. Evolutionary history of *C. heheva*.** (a) A species tree of 7 echinoderm species. In  
1067 total, 988 single-copy orthologs were used to reconstruct the phylogenetic tree. The  
1068 divergence time between species pairs was listed above each node, and 95% confidence  
1069 internal of the estimated divergence time was denoted as blue bar. The numbers of protein  
1070 families that were significantly expanded (red) or contracted (blue) ( $P < 0.05$ ) in each species  
1071 are denoted beside the species names. (b) Demographic history of *C. heheva* (blue) and *A.*  
1072 *japonicus* (red). The changes of ancestral population size of *C. heheva* and *A. japonicus*  
1073 were inferred using the PSMC method. Time in history was estimated by assuming a generation  
1074 time of 3 years and a mutation rate of  $1.0 \times 10^{-8}$ .

1075

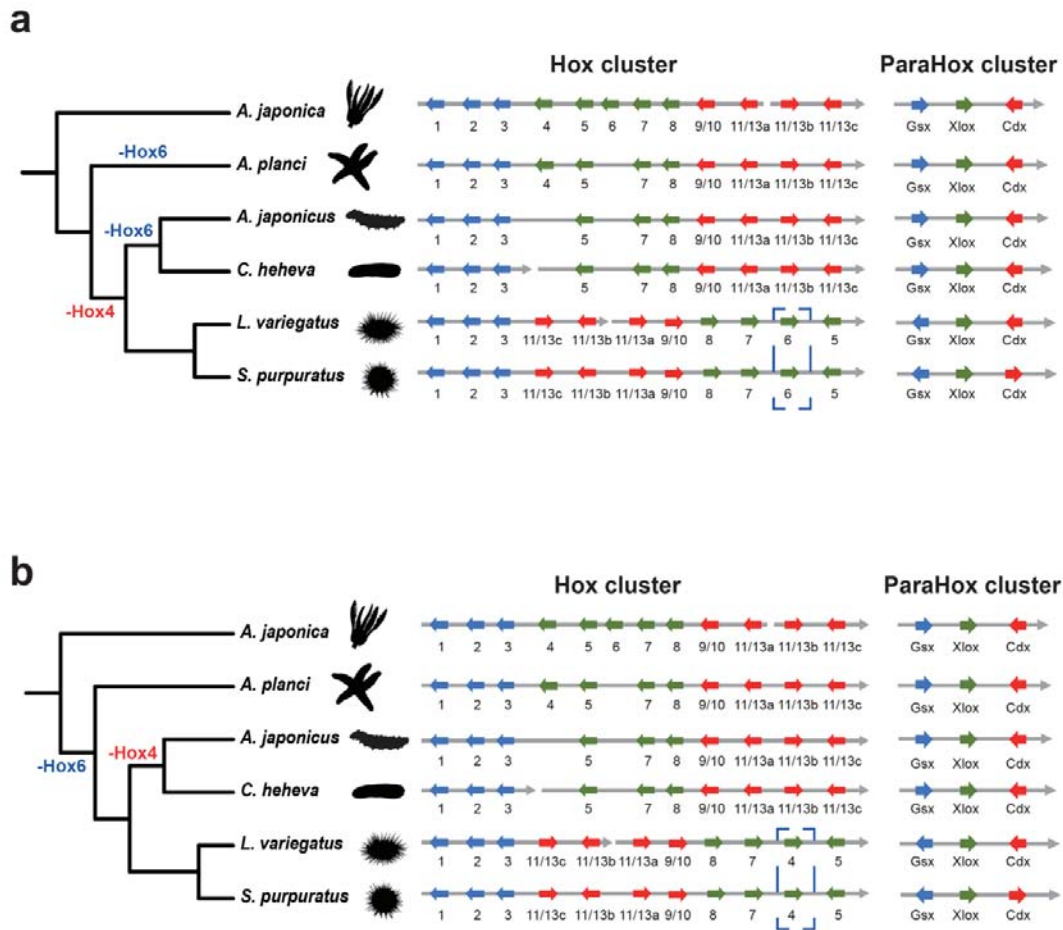

1076

1077

1078 **Figure 4. Genomic organization of *Hox* and *ParaHox* gene clusters in echinoderms. *Hox***

1079 **and *ParaHox* genes are indicated by arrows. The gene composition and orientation of *Hox***

1080 **and *ParaHox* clusters are consistent between two holothurians (*C. heheva*, *A. japonicus*). (a)**

1081 **The organization of *Hox* genes in echinoderms if *Hox4* is lost in echinoids (*L. variegatus*, *S.***

1082 ***purpuratus*). (b) The organization of *Hox* genes in echinoderms if *Hox6* is lost in echinoids.**

1083

1084

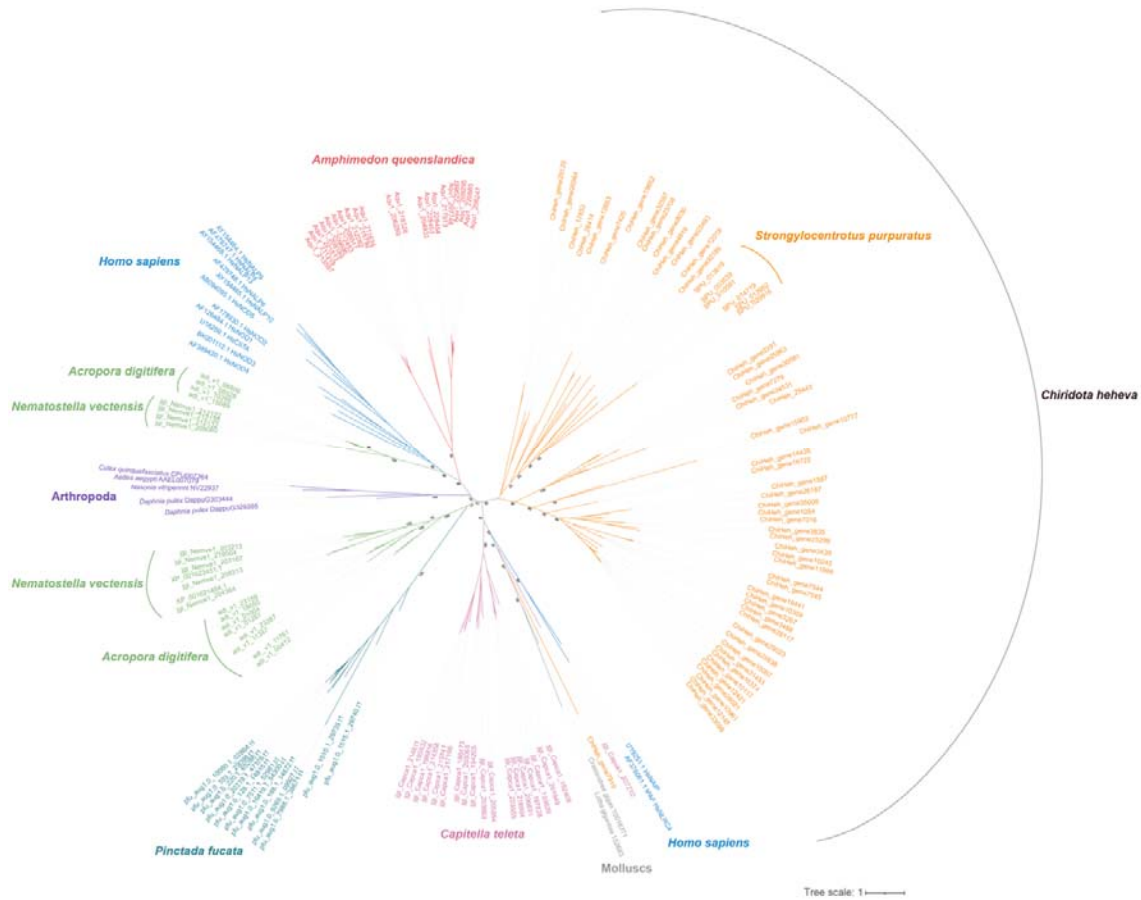

1085

1086 **Figure 5. Evolutionary relationships among *C.heheva* NLRs and other representative**  
1087 **metazoan NLRs.** The unrooted phylogenetic tree was reconstructed based on the NACHT  
1088 domain sequences using a maximum likelihood method. The values near the nodes are  
1089 ultrafast bootstrap (UFBoot) values. NLRs from different types of species are highlighted by  
1090 branches of different colors. The species name is shown near the corresponding lineage.

1091

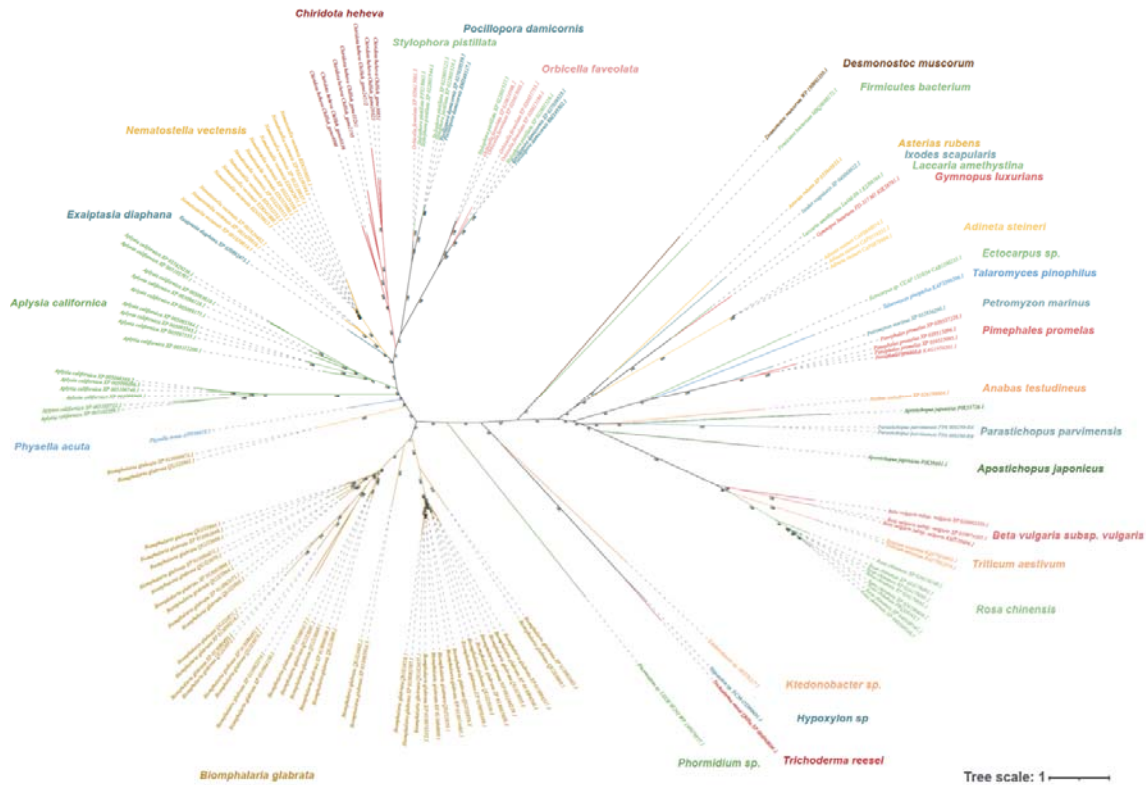

**Figure 6. Evolutionary relationship with aerolysin-like proteins (ALPs) from *C. heheva* and other species.** The unrooted phylogenetic tree was reconstructed using a maximum likelihood method. The values near the nodes are ultrafast bootstrap (UFBoot) values. ALPs from different types of species are highlighted by branches of different colors. The species name is shown near the corresponding lineage. ALPs from *C. heheva* do not cluster with ALPs from other echinoderms (*A. japonicus*, *P. parvimensis*), but with the ones from sea anemones (*N. vectensis*, *E. diaphana*).
